1 **Patient-derived xenograft studies of fumarate hydratase (FH)-deficient uterine leiomyoma**  
2 **subtype**

3

4 Takuya Kajimura<sup>1</sup>, Vanida Ann Serna<sup>1</sup>, Emma Amurgis<sup>1</sup>, Michael Blumenfeld<sup>2</sup>, and Takeshi  
5 Kurita<sup>1\*</sup>

6

7 <sup>1</sup> Department of Cancer Biology and Genetics, The Comprehensive Cancer Center, Ohio State  
8 University, Columbus, Ohio, United States of America

9

10 <sup>2</sup> Department of Obstetrics and Gynecology, Ohio State University, Columbus, Ohio, United  
11 States of America

12

13

14 \* Corresponding author

15 E-mail: [takeshi.kurita@osumc.edu](mailto:takeshi.kurita@osumc.edu). (TK)

16

17 **Keywords:** myometrium; fibroid; uterine leiomyoma subtype; tumor-associated fibroblasts; 17 $\beta$ -  
18 estradiol; progesterone; patient-derived xenograft; aldo-keto reductase family 1 member B10  
19 (AKR1B10)

20

21

22

23

24

25

## 26 **Abstract**

27 Uterine leiomyoma (LM) is the most common benign gynecological tumor in premenopausal  
28 women. Our previous patient-derived xenograft (PDX) studies established that 17 $\beta$ -estradiol  
29 (E2) and progesterone (P4) stimulate the growth of the two most prevalent subtypes, MED12  
30 mutant (MED12-LM) and HMGA2 overexpressing LMs (HMGA2-LM), via proliferation and  
31 hypertrophy of smooth muscle tumor cells (SMTCs). In addition, tumor-associated fibroblasts  
32 (TAFs) that do not carry *MED12* mutations also contribute to the growth of MED12-LM by  
33 secreting extracellular matrix (ECM) proteins. In this study, we investigated the growth control of  
34 the fumarate hydratase (FH) deficient LM (FH-LM) subtype, utilizing the PDX model. We  
35 identified an FH-negative case with conventional leiomyoma histology. The overexpression of  
36 aldo-keto reductase family 1 member B10 (AKR1B10) confirmed the FH deficiency. Like  
37 MED12-LM, FH-LM comprised two major cell types: 54.4% SMTCs and 43.3% TAFs.  
38 Furthermore, the TAFs expressed FH. The FH-LM PDXs grew in response to E2 and P4 via  
39 proliferation and hypertrophy of SMTCs, similar to MED12-LM and HMGA2-LM. While E2 alone  
40 did not stimulate growth, E2 was essential for sensitizing FH-deficient SMTCs to P4 by  
41 upregulating progesterone receptor (PGR). Our current study established that the growth of the  
42 three most prevalent LM subtypes, MED12-LM, HMGA2-LM, and FH-LM, depends on E2 and  
43 P4. Thus, selective progesterone receptor modulators (SPRMs) should be an effective  
44 treatment option for most symptomatic LM patients.

45

46

## 47 Introduction

48 Uterine leiomyoma (LM), also known as uterine fibroid, is a benign smooth muscle tumor of the  
49 myometrium (MM) with a cumulative incidence of approximately 70% [1, 2]. Recent  
50 transcriptome and genomic analyses identified four major LM subtypes with distinct molecular  
51 profiles, *MED12* mutant (MED12-LM), HMGA2 overexpressing (HMGA2-LM), fumarate  
52 hydratase (*FH*) deficient (FH-LM), and *COL4A5-COL4A6*-deletion subtypes (COL4A5/6-LM) [3,  
53 4]. Additionally, there are LMs that do not bear any of the major 4 subtype genetic alterations  
54 (quadruple-negative-LMs). MED12-LM and HMGA2-LM are the two most common subtypes  
55 accounting for approximately 70% and 15% of all LM cases, respectively. Our previous patient-  
56 derived xenograft (PDX) studies established that 17 $\beta$ -estradiol (E2) and progesterone (P4)  
57 stimulate the growth of these two major LM subtypes via proliferation and hypertrophy of  
58 smooth muscle tumor cells (SMTCs) [5-7]. Meanwhile, the cellular composition of MED12-LM  
59 and HMGA2-LM is distinctive: tumor-associated fibroblasts (TAFs), which do not carry driver  
60 mutations, account for >40% of the cell population in MED12-LM but <10% in HMGA2-LM. In  
61 MED12-LM, TAFs also contribute to tumor growth by secreting extracellular matrix (ECM) [7, 8].  
62 While the unique genetic mutations and gene expression profiles suggest distinctive biology, the  
63 growth regulation of LM subtypes other than MED12-LM and HMGA2-LM are currently  
64 unknown.

65 FH-LM is the third most prevalent LM subtype occurring in 0.4 - 2.6% of all LM cases [9-12]. FH  
66 is a tricarboxylic acid (TCA) cycle enzyme that catalyzes the reversible stereospecific hydration  
67 of fumarate to L-malate, and its loss of function is associated with tumorigenesis [13]. However,  
68 the exact mechanisms of how FH-deficiency drives LM formation remain unknown. FH-LM is  
69 often associated with Hereditary Leiomyomatosis and Renal Cell Cancer (HLRCC), a hereditary  
70 syndrome predisposed to cutaneous leiomyoma, LM, and renal cell cancer due to germline  
71 mutations of *FH*. However, recent studies suggest that sporadic FH-LM cases in non-HLRCC

72 carriers are as common as HLRCC-associated FH-LM cases [12, 14]. In addition, neither  
73 mutation analysis nor FH immunohistochemistry is sufficient to identify FH-LM because the loss  
74 of FH protein can occur independently of *FH* mutations, and a small proportion of FH-LMs retain  
75 FH protein [12, 14, 15]. Thus, the true prevalence of FH-LM may be higher than current  
76 estimates. Accordingly, understanding the pathogenesis of FH-LM subtype is crucial.  
77 Primary cell culture has been a standard research model of LMs. However, SMTCs cannot be  
78 maintained in 2D cell culture [16, 17]. In addition, *in vitro* models, including 3D  
79 spheroid/organoid cultures, do not replicate the hormone-dependent growth of LM cells [18].  
80 Thus, in this manuscript, we investigated the growth control of FH-LM, utilizing a patient-derived  
81 xenograft (PDX) model, which faithfully replicates the hormone-dependent growth of LM [5, 19].

82

## 83 **Materials and Methods**

### 84 **Collection and characterization of LM cases**

85 The acquisition and research use of surgical specimens were approved by the Institutional Review  
86 Boards of the Ohio State University and Northwestern University. LM and MM samples were  
87 obtained from hysterectomy or myomectomy patients with prior written informed consent and  
88 delivered to research personnel within 5 hours of surgical removal. The MED12-LM and HMGA2-  
89 LM subtypes were identified as previously described [7]. To determine *MED12* genotype, genomic  
90 DNA was extracted from LM and MM samples, and the sequence of *MED12* exon 1, intron 1, and  
91 exon 2 was determined by the Sanger sequencing of PCR products. To amplify *MED12* from exon  
92 1 to exon 2, we used two primer sets, 5'-gtcggattgtccgatggtt-3' (forward) and 5'-  
93 gtcagtgcctcctcctagg-3' (reverse) and 5'-ggtggctgggaatcctagtg-3' (forward) and 5'-  
94 ccctataagtcttccaaccca-3' (reverse). LM cases were classified as HMGA2-LMs when >50% of  
95 cells showed intense nuclear staining in HMGA2 IHC. In this study, the genomic DNA was  
96 extracted from the formalin-fixed paraffin-embedded tissues. However, sequence analysis of *FH*

97 and *COL4A5-COL4A6* loci was impossible due to the low yield and quality of genomic DNA.  
98 Accordingly, FH-LM and COL4A5/6-LM were identified by the loss of FH and COL4A5 proteins  
99 utilizing IHC.

## 100 **PDX experiment**

101 The procedures for PDX model preparation have been described previously [19]. Twenty-five  
102 PDXs were prepared from a single FH-LM sample and grafted into 12 adult NSG (NOD.Cg-  
103 *Prkdc<sup>scid</sup> Il2rg<sup>tm1Wjl</sup>/SzJ*) female mice (Jackson Laboratory, Bar Harbor, ME, USA). All host mice  
104 were ovariectomized and subcutaneously implanted with a 70 mg slow-releasing pellet  
105 containing E2 and P4 (E2P4) [19]. Four weeks later, one group of mice was euthanized to  
106 collect PDXs, and E2P4 pellets were removed from the remaining hosts. These host mice were  
107 divided into 3 groups (N = 2) and implanted with no hormone (NH), a 70 mg slow-releasing E2  
108 pellet, or a new E2P4 pellet (E2P4). They were euthanized 2 weeks after hormone pellet  
109 replacement to collect PDXs. After measuring the tumor volume [19], PDXs were fixed with  
110 Modified Davidson's fixative solution (Electron Microscopy Sciences, Hatfield, PA) overnight and  
111 processed into paraffin blocks processed for histologically analysis, as previously described  
112 [20]. This experiment was carried out in strict accordance with the recommendations in the  
113 Guide for the Care and Use of Laboratory Animals of the National Institutes of Health. The  
114 protocol was approved by the Institutional Animal Care and Use Committee (IACUC) of the Ohio  
115 State University (Protocol Number: 2014A00000060). All surgery was performed under  
116 ketamine and xylazine anesthesia, and all efforts were made to minimize suffering.

## 117 **Immunostaining**

118 IHC with DAB (3,30-diaminobenzidine) and immunofluorescence (IF) were performed following  
119 the methods previously described [21] with minor modifications. Paraffin blocks were sectioned  
120 at 5  $\mu$ m and mounted on ASI Supreme Frosted Glass Microscope Slides (Alkali Scientific, Fort  
121 Lauderdale, FL). Slides were pre-heated on a slide warmer at 60 °C for >15 min and

122 deparaffinized through the series of xylene and ethanol. For hematoxylin and eosin (H&E) staining,  
123 slides were stained with SelecTech Hematoxylin/Eosin Staining System (Leica Biosystems,  
124 Buffalo Grove, IL). For immunostaining, slides were emersed in 10mM sodium citrate buffer (pH  
125 6.0) containing 0.05% Tween 20 and heated for 30 min in an Electric Pressure Cooker. Tissue  
126 sections were separated by drawing a circle around with a PAP pen (Daido Sangyo, Tokyo,  
127 Japan) and incubated with a blocking buffer (2% donkey serum, 1% BSA, 0.1% Cod fish gelatin,  
128 0.1% TritonX100, 0.05% sodium azide, 0.05 % Tween 20, 10mM PBS) at a room temperature  
129 (RT, ~20 – 23 °C) for 60 min, followed by incubation with a primary antibody at 4 °C overnight.  
130 The following primary antibodies were used at indicated dilutions: anti-FH (1:200,10966-1-AP,  
131 Proteintech, Rosement, IL), anti-HMGA2 (1:800, #8179) and anti-vimentin (VIM) (1:200, #9856)  
132 (Cell Signaling Technologies, Danvers, MA), anti-MKI67 (1:100, ab92742), anti-calponin (1:100,  
133 ab197639), anti-TOMM20 (1:200, ab56783) and anti-ACTA2 (1:500, ab781) (Abcam, Boston,  
134 MA), anti-COL4A5 (1:1000, PA5-119042), anti-ARK1B10 (1:1000, PA5-22036) (Thermo Scientific,  
135 Waltham, MA), anti-ESR1 (1:100 RM9101-S, Lab Vision), anti-MED12 (1:50, HPA003184,  
136 Sigma-Aldrich, St. Louis, MO) and anti-PGR (1:200, A0098, Agilent Technologies, Santa Clara,  
137 CA). For IHC, biotinylated anti-rabbit IgG (H+L) (1:800, 711-066-152, Jackson ImmunoResearch,  
138 West Grove, PA) was used as the secondary antibody in combination with streptavidin-  
139 horseradish peroxidase (1:400, 016-030-084, Jackson ImmunoResearch). IHC stained sections  
140 were counter-stained with Hematoxylin 560 MX (Leica Biosystems). For IF, the primary antibody  
141 was detected utilizing Alexa-Fluor594 anti-mouse IgG (H+L) (1:1000, 715-586-151, Jackson  
142 ImmunoResearch) and Alexa-Fluor488 anti-rabbit IgG (H+L) (1:100, 711-546-152, Jackson  
143 ImmunoResearch). For IF, the nucleus was stained with Hoechst 33258 (1:10000, Sigma-  
144 Aldrich). Micrographs were captured using a BZ-9000 microscope (Keyence, Itasca, IL).

## 145 **Morphometric analysis**

146 The morphometric analyses were performed as previously described [7]. For the analysis of  
147 original tumors, at least 3 pieces sampled from different parts of the tumor were included in the  
148 analysis.

149

150

151 The cellular composition of smooth muscle cells (SMCs) versus non-SMCs was determined by  
152 counting the nuclei of calponin (SMC marker)-positive and negative cells (total >200 cells per  
153 section x >3 sections per sample) in tissue sections stained for calponin and vimentin (VIM). The  
154 concentration of fibroblasts was determined by counting non-vascular cells positive for VIM but  
155 negative for calponin. In the cell composition analysis of the FH-LM case, 5 pieces dissected from  
156 different parts of the original tumor were considered independent samples.

157 The MKI67 labeling indices were determined by manually counting positive and negative cells for  
158 ACTA2 (SM marker) and MKI67 in double IF-stained tissue sections. At least 300 cells per  
159 sample and 1,000 cells per group were counted blindly. SMTC size was calculated as total  
160 ACTA2-positive pixel number divided by the number of ACTA2-positive cells (ACTA2-positive  
161 area per SMTC cell). In this analysis, at least 300 cells per sample and 1,000 total cells per group  
162 were counted blindly. Cell density was determined as the number of nuclei within target areas  
163 (>5 mm<sup>2</sup> per group and >1 mm<sup>2</sup> per sample). For each sample, at least 500 total cells from five  
164 fields (40x magnification) were counted blindly. We used analysis of variance (ANOVA) to  
165 compare more than two groups, and p<0.05 was considered significant. Data were presented as  
166 mean values with standard deviation (SD).

167

## 168 **Results**

### 169 **Analysis of archived LM samples used to generate PDXs**

170 We determined the subtypes of 17 archived LM cases used for PDX studies, including 12 cases  
 171 analyzed in our previous studies [5-8, 19] (Table 1). All 17 cases showed conventional LM  
 172 histology (Fig 1A). Among these samples, 9 cases (52.9%) harboring *MED12* mutations were  
 173 classified as MED12-LM (Table 1). Nevertheless, there was no evident difference in the  
 174 expression pattern of MED12 among all LM cases and MM, as assessed by IHC (Fig 1B).  
 175 Among 17 cases, 4 LMs (23.5%) were classified into HMGA2-LM, presenting an elevated level  
 176 of HMGA expression (Fig 1B). These 4 HMGA2-LM cases were used in our previous PDX  
 177 studies [7]. Additionally, IHC screening identified a LM case negative for FH (Fig 1B). Three  
 178 cases (17.6%) were negative for *MED12* mutations and HMGA2 overexpression but positive for  
 179 FH expression (Table1). All 17 LM cases, including the 3 LMs of unknown subtype, were  
 180 positive for COL4A5 by IHC (Fig 1B).

Table.1 Histological character of LM tumors

| case. ID | LM subtype | MED12 mutant | HMGA2 overexpression | FH expression |
|----------|------------|--------------|----------------------|---------------|
| 1        | HMGA2-LM   | WT           | +                    | +             |
| 2        | MED12-LM   | c.130G>C     | -                    | +             |
| 3        | MED12-LM   | c.116T>C     | -                    | +             |
| 4        | MED12-LM   | c.131G>T     | -                    | +             |
| 5        | HMGA2-LM   | WT           | +                    | +             |
| 6        | MED12-LM   | c.130G>C     | -                    | +             |
| 7        | HMGA2-LM   | WT           | +                    | +             |
| 8        | MED12-LM   | c.131G>T     | -                    | +             |
| 9        | MED12-LM   | c.131G>A     | -                    | +             |
| 10       | MED12-LM   | c.131G>A     | -                    | +             |
| 11       | HMGA2-LM   | WT           | +                    | +             |
| 12       | unknown    | WT           | -                    | +             |
| 13       | FH-LM      | WT           | -                    | -             |
| 14       | unknown    | WT           | -                    | +             |
| 15       | unknown    | WT           | -                    | +             |
| 16       | MED12-LM   | c.131G>C     | -                    | +             |
| 17       | MED12-LM   | c.131G>T     | -                    | +             |

181



## 182 **Histological characteristics of FH-LM**

183 The FH-LM case showed the morphological characteristics of FH-deficient LMs [11, 22],  
184 including staghorn vessels (Fig 2Aa, Arrow), and enlarged nuclei with pseudoinclusions (Fig  
185 2Ac) [23]. IF assay for calponin (SMC marker) and VIM showed that the FH-LM contained a  
186 substantial concentration (43.3%) of TAFs (Fig 2B). The SMTc concentrations were not  
187 statistically different among FH-LM (54.4%), MED12-LM (54.3%), and MM (61.2%), whereas  
188 HMGA2-LM contained a significantly higher concentration of SMTcS (91.4%) than other LM  
189 subtypes and MM (Fig 2C) ( $P < 0.001$ ).

## 190 **FH expression patterns in MM and LM subtypes**

191 In MM and FH-positive LMs, FH was predominantly expressed in SMCs, and FH signals in  
192 TAFs were visible only with an extended exposure time that saturated the signals in SMCs (Fig  
193 3A). Co-localization with TOMM20, a mitochondrial marker, indicated that the high FH  
194 expression in SMCs reflected the high mitochondrial concentration (Fig 3B). FH was very low to  
195 undetectable in the FH-LM under the conditions used to detect FH in MM and other LM  
196 subtypes. Nonetheless, FH was detected in TAFs of the FH-LM when IF signals were detected  
197 with the extended exposure time (Fig 3A, arrow), suggesting that the loss of FH, the putative  
198 driver mutation, occurs only in SMTcS.

199 Since their growth depends on E2 and P4, the metabolism of MED12-LM and HMGA2-LM is  
200 likely regulated by ovarian steroids. Thus, we assessed the regulation of FH, a crucial enzyme  
201 in the TCA cycle, by E2 and P4 in LM PDXs. However, FH was constitutively expressed in  
202 SMTcS of MED12-LM and HMGA2-LM irrespectively of hormone treatments (Fig 3C).

## 203 **FH-LM overexpresses AKR1B10**

204 Aldo-Keto Reductase Family 1 Member B10 (AKR1B10), an NADPH-dependent reductase that  
205 catalyzes the reduction of a wide variety of carbonyl-containing compounds, is often

206 overexpressed in FH deficient tumors, including LM [4]. A recent study showed that AKR1B10  
207 can be a specific and sensitive marker of FH-LM [24]. Our IHC assay confirmed the previous  
208 report and detected a high expression of AKR1B10 only in FH-LM but not in other LM subtypes  
209 (Fig 4A). Although an HMGA2-LM showed a weak signal (Fig 4A), it was not comparable to the  
210 FH-LM. In the FH-LM, AKR1B10 was overexpressed only on SMTCs (Fig 4B), suggesting that  
211 FH-deficiency upregulates AKR1B10 cell-autonomously.

## 212 **E2 and P4 induce hypertrophy of SMTCs in FH-LM**

213 FH-LM PDXs were subjected to hormone treatments, as shown in Figure 5A. Four weeks after  
214 grafting, a host mouse was euthanized to collect PDXs, and E2P4 pellets were replaced in other  
215 hosts. Two weeks after hormone pellet replacement, only the E2P4 group maintained tumor  
216 volume, and the PDXs of no hormone (NH) and E2 groups were significantly reduced in volume  
217 (Fig 5B, C). The regression of PDXs in NH and E2 groups was due to reduced SMTC size (Fig  
218 6D). The increased cell density in NH and E2 groups (Fig. 5E) also supported that PDXs  
219 became smaller through cell size reduction but not cell death. These results indicate that FH-LM  
220 grows in response to E2 and P4 via SMTC hypertrophy, similarly to MED12-LM and HMGA2-  
221 LM.

## 222 **E2 and P4 stimulate cell proliferation in FH-LM**

223 The proliferation activity in FH-LM PDXs was assessed by MKI67 IF. Like MED12-LM and  
224 HMGA2-LM, the MKI67 labeling index of FH deficient SMTCs was significantly higher in the  
225 E2P4 group than in NH and E2 groups (Fig 6A). Similarly, the MKI67 labeling index of TAF was  
226 significantly higher in the E2P4 group than in the NH group, indicating that the growth of TAFs in  
227 FH-LM depends on E2 and P4. Meanwhile, there was no significant difference in the  
228 proliferation rate of TAFs between E2 and E2+P4 groups or E2 and NH groups (Fig 6B),  
229 suggesting that in FH-LM, the growth of TAFs was most efficiently stimulated by the  
230 combination of E2 and P4, but E2 alone also has a weak growth-promoting effect.

## 231 **Hormonal regulation of gene expression in FH-LM**

232 IF assays revealed that estrogen receptor  $\alpha$  (ESR1) was expressed in both SMTCs and TAFs  
233 irrespective of hormone treatments. In contrast, the expression of progesterone receptor (PGR)  
234 depended on E2 in both SMTCs and TAFs, like MED12-LM and HMGA2-LM (Fig 6C). This  
235 result can explain why both E2 and P4 are required to stimulate the growth of FH-LMs.  
236 Finally, we examined expression patterns of AKR1B10 in FH-LM PDXs. AKR1B10 was detected  
237 in SMTCs of all hormone treatment groups. Since AKR1B10 is constitutively expressed in FH-  
238 LMs, it can be an ideal surrogate marker for FH-deficiency.

239

## 240 **Discussion**

241 Through a series of PDX studies, we have elucidated cellular mechanisms of LM growth and  
242 have further specified these mechanisms to LM subtypes. In this study, we characterized the  
243 response of FH-LM to ovarian steroids. Interestingly, the three most frequent LM subtypes  
244 share many biological characteristics despite the distinct gene expression profiles and unique  
245 morphological features: the driver mutations are exclusively present in SMTCs; the tumor  
246 volume increases by cell number (proliferation) and size (hypertrophy), and the growth of  
247 SMTCs depends on P4, but E2 is also required for PGR expression. Since MED12-LM,  
248 HMGA2-LM, and FH-LM together account for ~90% of all LM cases, the current LM treatments  
249 targeting the hypothalamus-pituitary-ovary axis are effective for most LM patients.  
250 FH deficiency is a putative driver of multiple human neoplasms, including highly aggressive  
251 renal cell carcinoma. Therefore, research on the pathogenesis of FH-deficient tumors is  
252 clinically significant even though they are rare. Unfortunately, the low incidence makes the  
253 research on FH-deficient tumors challenging [9-11, 25], and how FH deficiency promotes  
254 tumorigenesis remains elusive. It is especially intriguing why germline inactivation of an FH

255 allele predisposes the carrier to certain types of neoplasms, even though FH is ubiquitously  
256 expressed as a vital enzyme in the mitochondrial respiratory chain [26].  
257 FH deficiency results in reduced 2-oxoglutarate (2-OG)-dependent dioxygenase (2-OGDD)  
258 activity. The 2-ODGGs are a large group of enzymes that catalyze hydroxylation reactions on  
259 various substrates (e.g., protein, nucleic acid, lipid, and metabolic intermediate), producing CO<sub>2</sub>  
260 and succinate. The activity of 2-OGDD depends on the intracellular ratio of 2-OG to inhibitors  
261 such as fumarate, succinate, and 2-hydroxyglutarate. It has been proposed that hypoxic  
262 responses triggered by reduced 2-OGDD activities contribute to the pathogenesis of FH-  
263 deficient tumors [27, 28]. In addition, the accumulation of fumarate inhibits 2-OG-dependent  
264 histone and DNA demethylases [27-29]. Thus, it has also been implied that FH deficiency  
265 promotes neoplastic transformation by epigenetic reprogramming. Furthermore, the  
266 accumulation of S-(2-succino)-cysteine (2SC) covalent modifications [25] may also play a role in  
267 the formation of FH-deficient tumors as epigenetic modifiers. The mechanisms mentioned  
268 above have been examined primarily in renal cell carcinoma. However, while renal cell  
269 carcinoma grows cell-autonomously, FH-LMs depend on E2 and P4 in their growth. Thus,  
270 whether FH-deficient LMs and renal cancers share molecular pathogenesis is unclear.  
271 Accordingly, the mechanisms through which FH deficiency causes tumors should be studied in  
272 the myometrium. However, the primary cell culture is unsuitable for studying the pathogenesis  
273 of FH-LM that contain a high concentration of TAFs. Thus, PDX studies with additional FH-LM  
274 cases are essential.  
275 Finally, our PDX studies determined the P4-dependency of the three most prevalent LM  
276 subtypes in their growth [5-8, 19]. However, ~10 % of LMs lack hallmark mutations of MED12-  
277 LM, HMGA2-LM, and FH-LM and show unique molecular signatures [4]. The growth control of  
278 these rare LMs may be distinct from the three major LM subtypes. In this respect,  
279 epidemiological studies showed the essential role of ovarian steroid in the pathogenesis of LM,  
280 but the effect of E2 and P4 could not be assessed separately. Accordingly, some rare LM

281 subtypes may be stimulated by E2 alone and thus unresponsive to SPRM treatments. Thus,  
282 understanding the growth characteristics of rare LM subtypes, including COL4A5/6-LM, is of  
283 utmost significance to designing treatment strategies for LMs.

284

## 285 **Acknowledgements**

286 We thank The Genomics Shared Resource (GSR) at The Ohio State University Comprehensive  
287 Cancer Center, and The Tissue Procurement Service Laboratory at The Ohio State University  
288 Wexner Medical Center.

289

## 290 **Grant Support**

291 Research reported in this publication was supported by the National Institutes of Health  
292 [R21HD102897 to T.K.], The Ohio State University Comprehensive Cancer Center and the  
293 National Institutes of Health [P30 CA016058].

294

295

## 296 **FIGURE LEGEND**

### 297 **Figure.1**

298 Histological analysis of MM and LM samples.

299 Representative images of H&E (**A**) and IHC (**B**) stained MM and LM subtypes.

300

### 301 **Figure. 2**

302 Histological characteristics of FH-LM

303 A. The H&E staining detected morphological features characteristic for FH-LM in the FH-

304 negative LM case, a staghorn-like vessel (arrow) (a) and enlarged nuclei with pseudoinclusions

305 (c, arrows). B. IF detection of calponin (green) and VIM (red) in 3 LM subtypes. FH-LM and

306 MED12-LM contained a substantial concentration of calponin-negative/VIM-positive cells  
307 (TAFs). C. Comparison of SMTc concentration among FH-LM, MED12-LM HMGA2-LM, and  
308 MM. Values of individual samples were plotted over a violin plot with an included boxplot. The  
309 original data for MM, MED12-LM, and HMGA2-LM (the right panel) were previously used in our  
310 study [7]. Each sample in these groups was derived from different patients. The five samples of  
311 FH-LM (the left panel) were derived from different parts of a single tumor. Statistical significance  
312 by ANOVA was indicated as \*\*\*  $p \leq 0.001$  and ns (not significant) ( $p > 0.05$ ).

313

314

### 315 **Figure. 3**

316 IF analysis of FH expression patterns in MM, MED12-LM, HMGA2-LM, and FH-LM subtypes.  
317 MM and LM samples were stained for FH (green) and either ACTA2 (red) (A and C) or  
318 TOMM20 (red) (B). A: FH was enriched in ACTA2-positive SMCs. B: Colocalization of FH and  
319 TOMM20 (yellow signal) indicated FH was expressed in mitochondria. C: FH expression in  
320 MED12-LM and HMGA2-LM PDXs treated with no hormone, E2, or E2P4 for 2 weeks [7]. In  
321 both LM subtypes, FH was constitutively expressed in SMTcs, and E2 and P4 had no  
322 detectable effects on the FH expression.

323

### 324 **Figure. 4**

325 AKR1B10 expression patterns in LM subtypes  
326 A: Representative images of AKR1B10 IHC in MM, MED12-LM, HMGA2-LM, and FH-LM.  
327 AKR1B10 (brown) was highly expressed in the FH-LM, but not MM and other LM subtypes. B:  
328 Expression pattern of AKR1B10 (green) and ACTA2 (red) in FH-LM. AKR1B10 was  
329 overexpressed in SMTcs (white arrow) but not in TAFs (yellow arrow).

330

331

332 **Figure. 5**

333 Hormonal response of FH-LM PDX

334 A: Treatment schedule. PDXs were grown for four weeks in hosts supplemented with E2P4 and  
335 then subjected to one of three different treatments, no hormone (NH), E2 alone (E2), or E2P4  
336 treatment, for two weeks (6 weeks after grafting). The PDXs were harvested for analyses at 4  
337 and 6 weeks. B: FH-LM PDXs on the host kidney: whole grafts (left panel), grafts with kidney  
338 tissue were bisected to measure the height (right panel) [19]. C, D, and E: PDX volume (C),  
339 SMTC size (D), and cell density (E). At 6 weeks, PDX volume and SMTC size were significantly  
340 higher in the E2P4 group than in NH and E2P4 groups. In contrast, the cell density had a  
341 reverse correlation with PDX volume and SMTC size, indicating that the SMTC size is the  
342 primary factor that determines the tumor volume. Statistical significance by ANOVA was  
343 indicated as \* $P \leq 0.05$ , \*\* $P \leq 0.01$ , \*\*\* $P \leq 0.001$ , and ns ( $P > 0.05$ )

344

345

346 **Figure. 6**

347 Hormonal regulation of cell proliferation and gene expression in FH-LM PDXs.

348 A and B: MKI67 labeling index of SMTCs (A) and TAFs (B) in FH-LM PDXs. Statistical

349 significance by ANOVA was indicated as \* $P \leq 0.05$ , \*\* $P \leq 0.01$ , \*\*\* $P \leq 0.001$ , and ns ( $P > 0.05$ ). C:

350 IF assay for ACTA2 (red) and MKI67, ESR1, PGR, or AKR1B10 (green).

351

352 **Reference**

- 353 1. Marshall LM, Spiegelman D, Barbieri RL, Goldman MB, Manson JE, Colditz GA, et  
354 al. Variation in the incidence of uterine leiomyoma among premenopausal women by  
355 age and race. *Obstet Gynecol.* 1997;90(6):967-73. PubMed PMID: 9397113.

- 356 2. Stewart EA, Laughlin-Tommaso SK, Catherino WH, Lalitkumar S, Gupta D,  
357 Vollenhoven B. Uterine fibroids. *Nat Rev Dis Primers*. 2016;2:16043. doi:  
358 10.1038/nrdp.2016.43. PubMed PMID: 27335259.
- 359 3. Mehine M, Kaasinen E, Makinen N, Katainen R, Kampjarvi K, Pitkanen E, et al.  
360 Characterization of uterine leiomyomas by whole-genome sequencing. *N Engl J*  
361 *Med*. 2013;369(1):43-53. doi: 10.1056/NEJMoa1302736. PubMed PMID: 23738515.
- 362 4. Mehine M, Kaasinen E, Heinonen HR, Mäkinen N, Kampjarvi K, Sarvilinna N, et al.  
363 Integrated data analysis reveals uterine leiomyoma subtypes with distinct driver  
364 pathways and biomarkers. *Proc Natl Acad Sci U S A*. 2016;113(5):1315-20. doi:  
365 10.1073/pnas.1518752113. PubMed PMID: 26787895; PubMed Central PMCID:  
366 PMCPMC4747776.
- 367 5. Ishikawa H, Ishi K, Serna VA, Kakazu R, Bulun SE, Kurita T. Progesterone is  
368 essential for maintenance and growth of uterine leiomyoma. *Endocrinology*.  
369 2010;151(6):2433-42. Epub 2010/04/09. doi: 10.1210/en.2009-1225. PubMed PMID:  
370 20375184; PubMed Central PMCID: PMCPMC2875812.
- 371 6. Serna VA, Wu X, Qiang W, Thomas J, Blumenfeld ML, Kurita T. Cellular kinetics of  
372 *MED12*-mutant uterine leiomyoma growth and regression in vivo. *Endocrine-Related*  
373 *Cancer*. 2018;25(7):747-59. Epub 2018/04/28. doi: 10.1530/ERC-18-0184. PubMed  
374 PMID: 29700012; PubMed Central PMCID: PMCPMC6032993.
- 375 7. Wu X, Serna VA, Thomas J, Qiang W, Blumenfeld ML, Kurita T. Subtype-Specific  
376 Tumor-Associated Fibroblasts Contribute to the Pathogenesis of Uterine  
377 Leiomyoma. *Cancer Res*. 2017;77(24):6891-901. Epub 2017/10/22. doi:  
378 10.1158/0008-5472.CAN-17-1744. PubMed PMID: 29055020; PubMed Central  
379 PMCID: PMCPMC6015476.
- 380 8. Qiang W, Liu Z, Serna VA, Druschitz SA, Liu Y, Espona-Fiedler M, et al. Down-  
381 regulation of miR-29b is essential for pathogenesis of uterine leiomyoma.  
382 *Endocrinology*. 2014;155(3):663-9. Epub 2014/01/16. doi: 10.1210/en.2013-1763.  
383 PubMed PMID: 24424054; PubMed Central PMCID: PMCPMC3929741.
- 384 9. Joseph NM, Solomon DA, Frizzell N, Rabban JT, Zaloudek C, Garg K. Morphology  
385 and Immunohistochemistry for 2SC and FH Aid in Detection of Fumarate Hydratase  
386 Gene Aberrations in Uterine Leiomyomas From Young Patients. *Am J Surg Pathol*.  
387 2015;39(11):1529-39. doi: 10.1097/PAS.0000000000000520. PubMed PMID:  
388 26457356.
- 389 10. Miettinen M, Felisiak-Golabek A, Wasag B, Chmara M, Wang Z, Butzow R, et al.  
390 Fumarase-deficient Uterine Leiomyomas: An Immunohistochemical, Molecular  
391 Genetic, and Clinicopathologic Study of 86 Cases. *Am J Surg Pathol*.  
392 2016;40(12):1661-9. doi: 10.1097/PAS.0000000000000703. PubMed PMID:  
393 27454940; PubMed Central PMCID: PMCPMC5106328.
- 394 11. Siegler L, Erber R, Burghaus S, Brodkorb T, Wachter D, Wilkinson N, et al.  
395 Fumarate hydratase (FH) deficiency in uterine leiomyomas: recognition by  
396 histological features versus blind immunoscreening. *Virchows Arch*.  
397 2018;472(5):789-96. Epub 20180113. doi: 10.1007/s00428-018-2292-6. PubMed  
398 PMID: 29332133.
- 399 12. Liu C, Dillon J, Beavis AL, Liu Y, Lombardo K, Fader AN, et al. Prevalence of  
400 somatic and germline mutations of Fumarate hydratase in uterine leiomyomas from



- 401 young patients. *Histopathology*. 2020;76(3):354-65. Epub 20200113. doi:  
402 10.1111/his.14007. PubMed PMID: 31564060.
- 403 13. Schmidt C, Sciacovelli M, Frezza C. Fumarate hydratase in cancer: A multifaceted  
404 tumour suppressor. *Semin Cell Dev Biol*. 2020;98:15-25. Epub 20190522. doi:  
405 10.1016/j.semcdb.2019.05.002. PubMed PMID: 31085323; PubMed Central PMCID:  
406 PMC6974395.
- 407 14. Harrison WJ, Andrici J, Maclean F, Madadi-Ghahan R, Farzin M, Sioson L, et al.  
408 Fumarate Hydratase-deficient Uterine Leiomyomas Occur in Both the Syndromic  
409 and Sporadic Settings. *Am J Surg Pathol*. 2016;40(5):599-607. doi:  
410 10.1097/PAS.0000000000000573. PubMed PMID: 26574848; PubMed Central  
411 PMCID: PMC64830748.
- 412 15. Martinek P, Grossmann P, Hes O, Bouda J, Eret V, Frizzell N, et al. Genetic testing  
413 of leiomyoma tissue in women younger than 30 years old might provide an effective  
414 screening approach for the hereditary leiomyomatosis and renal cell cancer  
415 syndrome (HLRCC). *Virchows Arch*. 2015;467(2):185-91. Epub 20150519. doi:  
416 10.1007/s00428-015-1783-y. PubMed PMID: 25985877.
- 417 16. Markowski DN, Tadayyon M, Bartnitzke S, Belge G, Maria Helmke B, Bullerdiek J.  
418 Cell cultures in uterine leiomyomas: rapid disappearance of cells carrying MED12  
419 mutations. *Genes Chromosomes Cancer*. 2014;53(4):317-23. Epub 2014/01/22. doi:  
420 10.1002/gcc.22142. PubMed PMID: 24446130.
- 421 17. Bloch J, Holzmann C, Koczan D, Helmke BM, Bullerdiek J. Factors affecting the loss  
422 of MED12-mutated leiomyoma cells during in vitro growth. *Oncotarget*.  
423 2017;8(21):34762-72. doi: 10.18632/oncotarget.16711. PubMed PMID: 28410233;  
424 PubMed Central PMCID: PMC6471009.
- 425 18. Vidimar V, Chakravarti D, Bulun SE, Yin P, Nowak R, Wei JJ, et al. The AKT/BCL-2  
426 Axis Mediates Survival of Uterine Leiomyoma in a Novel 3D Spheroid Model.  
427 *Endocrinology*. 2018;159(3):1453-62. Epub 2018/01/31. doi: 10.1210/en.2017-  
428 03191. PubMed PMID: 29381777; PubMed Central PMCID: PMC65839731.
- 429 19. Serna VA, Kurita T. Patient-derived xenograft model for uterine leiomyoma by sub-  
430 renal capsule grafting. *Journal of Biological Methods*. 2018;5(2):e91. Epub  
431 2018/12/14. doi: 10.14440/jbm.2018.243. PubMed PMID: 30547045; PubMed  
432 Central PMCID: PMC6289531.
- 433 20. Kim SY, Cordeiro MH, Serna VA, Ebbert K, Butler LM, Sinha S, et al. Rescue of  
434 platinum-damaged oocytes from programmed cell death through inactivation of the  
435 p53 family signaling network. *Cell Death Differ*. 2013;20(8):987-97. Epub  
436 2013/04/20. doi: 10.1038/cdd.2013.31. PubMed PMID: 23598363; PubMed Central  
437 PMCID: PMC3705595.
- 438 21. Terakawa J, Rocchi A, Serna VA, Bottinger EP, Graff JM, Kurita T. FGFR2IIIb-  
439 MAPK Activity Is Required for Epithelial Cell Fate Decision in the Lower Müllerian  
440 Duct. *Molecular Endocrinology*. 2016;30(7):783-95. doi: 10.1210/me.2016-1027.  
441 PubMed PMID: 27164167; PubMed Central PMCID: PMC64926232.
- 442 22. Reyes C, Karamurzin Y, Frizzell N, Garg K, Nonaka D, Chen YB, et al. Uterine  
443 smooth muscle tumors with features suggesting fumarate hydratase aberration:  
444 detailed morphologic analysis and correlation with S-(2-succino)-cysteine  
445 immunohistochemistry. *Mod Pathol*. 2014;27(7):1020-7. Epub 20131206. doi:

- 446 10.1038/modpathol.2013.215. PubMed PMID: 24309325; PubMed Central PMCID:  
447 PMCPMC4048336.
- 448 23. Sanz-Ortega J, Vocke C, Stratton P, Linehan WM, Merino MJ. Morphologic and  
449 molecular characteristics of uterine leiomyomas in hereditary leiomyomatosis and  
450 renal cancer (HLRCC) syndrome. *Am J Surg Pathol.* 2013;37(1):74-80. doi:  
451 10.1097/PAS.0b013e31825ec16f. PubMed PMID: 23211287; PubMed Central  
452 PMCID: PMCPMC3524342.
- 453 24. Ahvenainen T, Kaukoma J, Kampjarvi K, Uimari O, Ahtikoski A, Makinen N, et al.  
454 Comparison of 2SC, AKR1B10, and FH Antibodies as Potential Biomarkers for FH-  
455 deficient Uterine Leiomyomas. *Am J Surg Pathol.* 2022;46(4):537-46. doi:  
456 10.1097/PAS.0000000000001826. PubMed PMID: 34678832.
- 457 25. Gupta S, Swanson AA, Chen YB, Lopez T, Milosevic D, Kipp BR, et al. Incidence of  
458 succinate dehydrogenase and fumarate hydratase-deficient renal cell carcinoma  
459 based on immunohistochemical screening with SDHA/SDHB and FH/2SC. *Hum*  
460 *Pathol.* 2019;91:114-22. Epub 20190709. doi: 10.1016/j.humpath.2019.07.004.  
461 PubMed PMID: 31299266; PubMed Central PMCID: PMCPMC7528421.
- 462 26. Zhang C, Li L, Zhang Y, Zeng C. Hereditary Leiomyomatosis and Renal Cell Cancer:  
463 Recent Insights Into Mechanisms and Systemic Treatment. *Front Oncol.*  
464 2021;11:686556. Epub 20210525. doi: 10.3389/fonc.2021.686556. PubMed PMID:  
465 34113573; PubMed Central PMCID: PMCPMC8185197.
- 466 27. Martinez-Reyes I, Chandel NS. Mitochondrial TCA cycle metabolites control  
467 physiology and disease. *Nat Commun.* 2020;11(1):102. Epub 20200103. doi:  
468 10.1038/s41467-019-13668-3. PubMed PMID: 31900386; PubMed Central PMCID:  
469 PMCPMC6941980.
- 470 28. Sun L, Zhang H, Gao P. Metabolic reprogramming and epigenetic modifications on  
471 the path to cancer. *Protein Cell.* 2022;13(12):877-919. Epub 20210529. doi:  
472 10.1007/s13238-021-00846-7. PubMed PMID: 34050894.
- 473 29. Letouze E, Martinelli C, Loriot C, Burnichon N, Abermil N, Ottolenghi C, et al. SDH  
474 mutations establish a hypermethylator phenotype in paraganglioma. *Cancer Cell.*  
475 2013;23(6):739-52. Epub 20130523. doi: 10.1016/j.ccr.2013.04.018. PubMed PMID:  
476 23707781.  
477

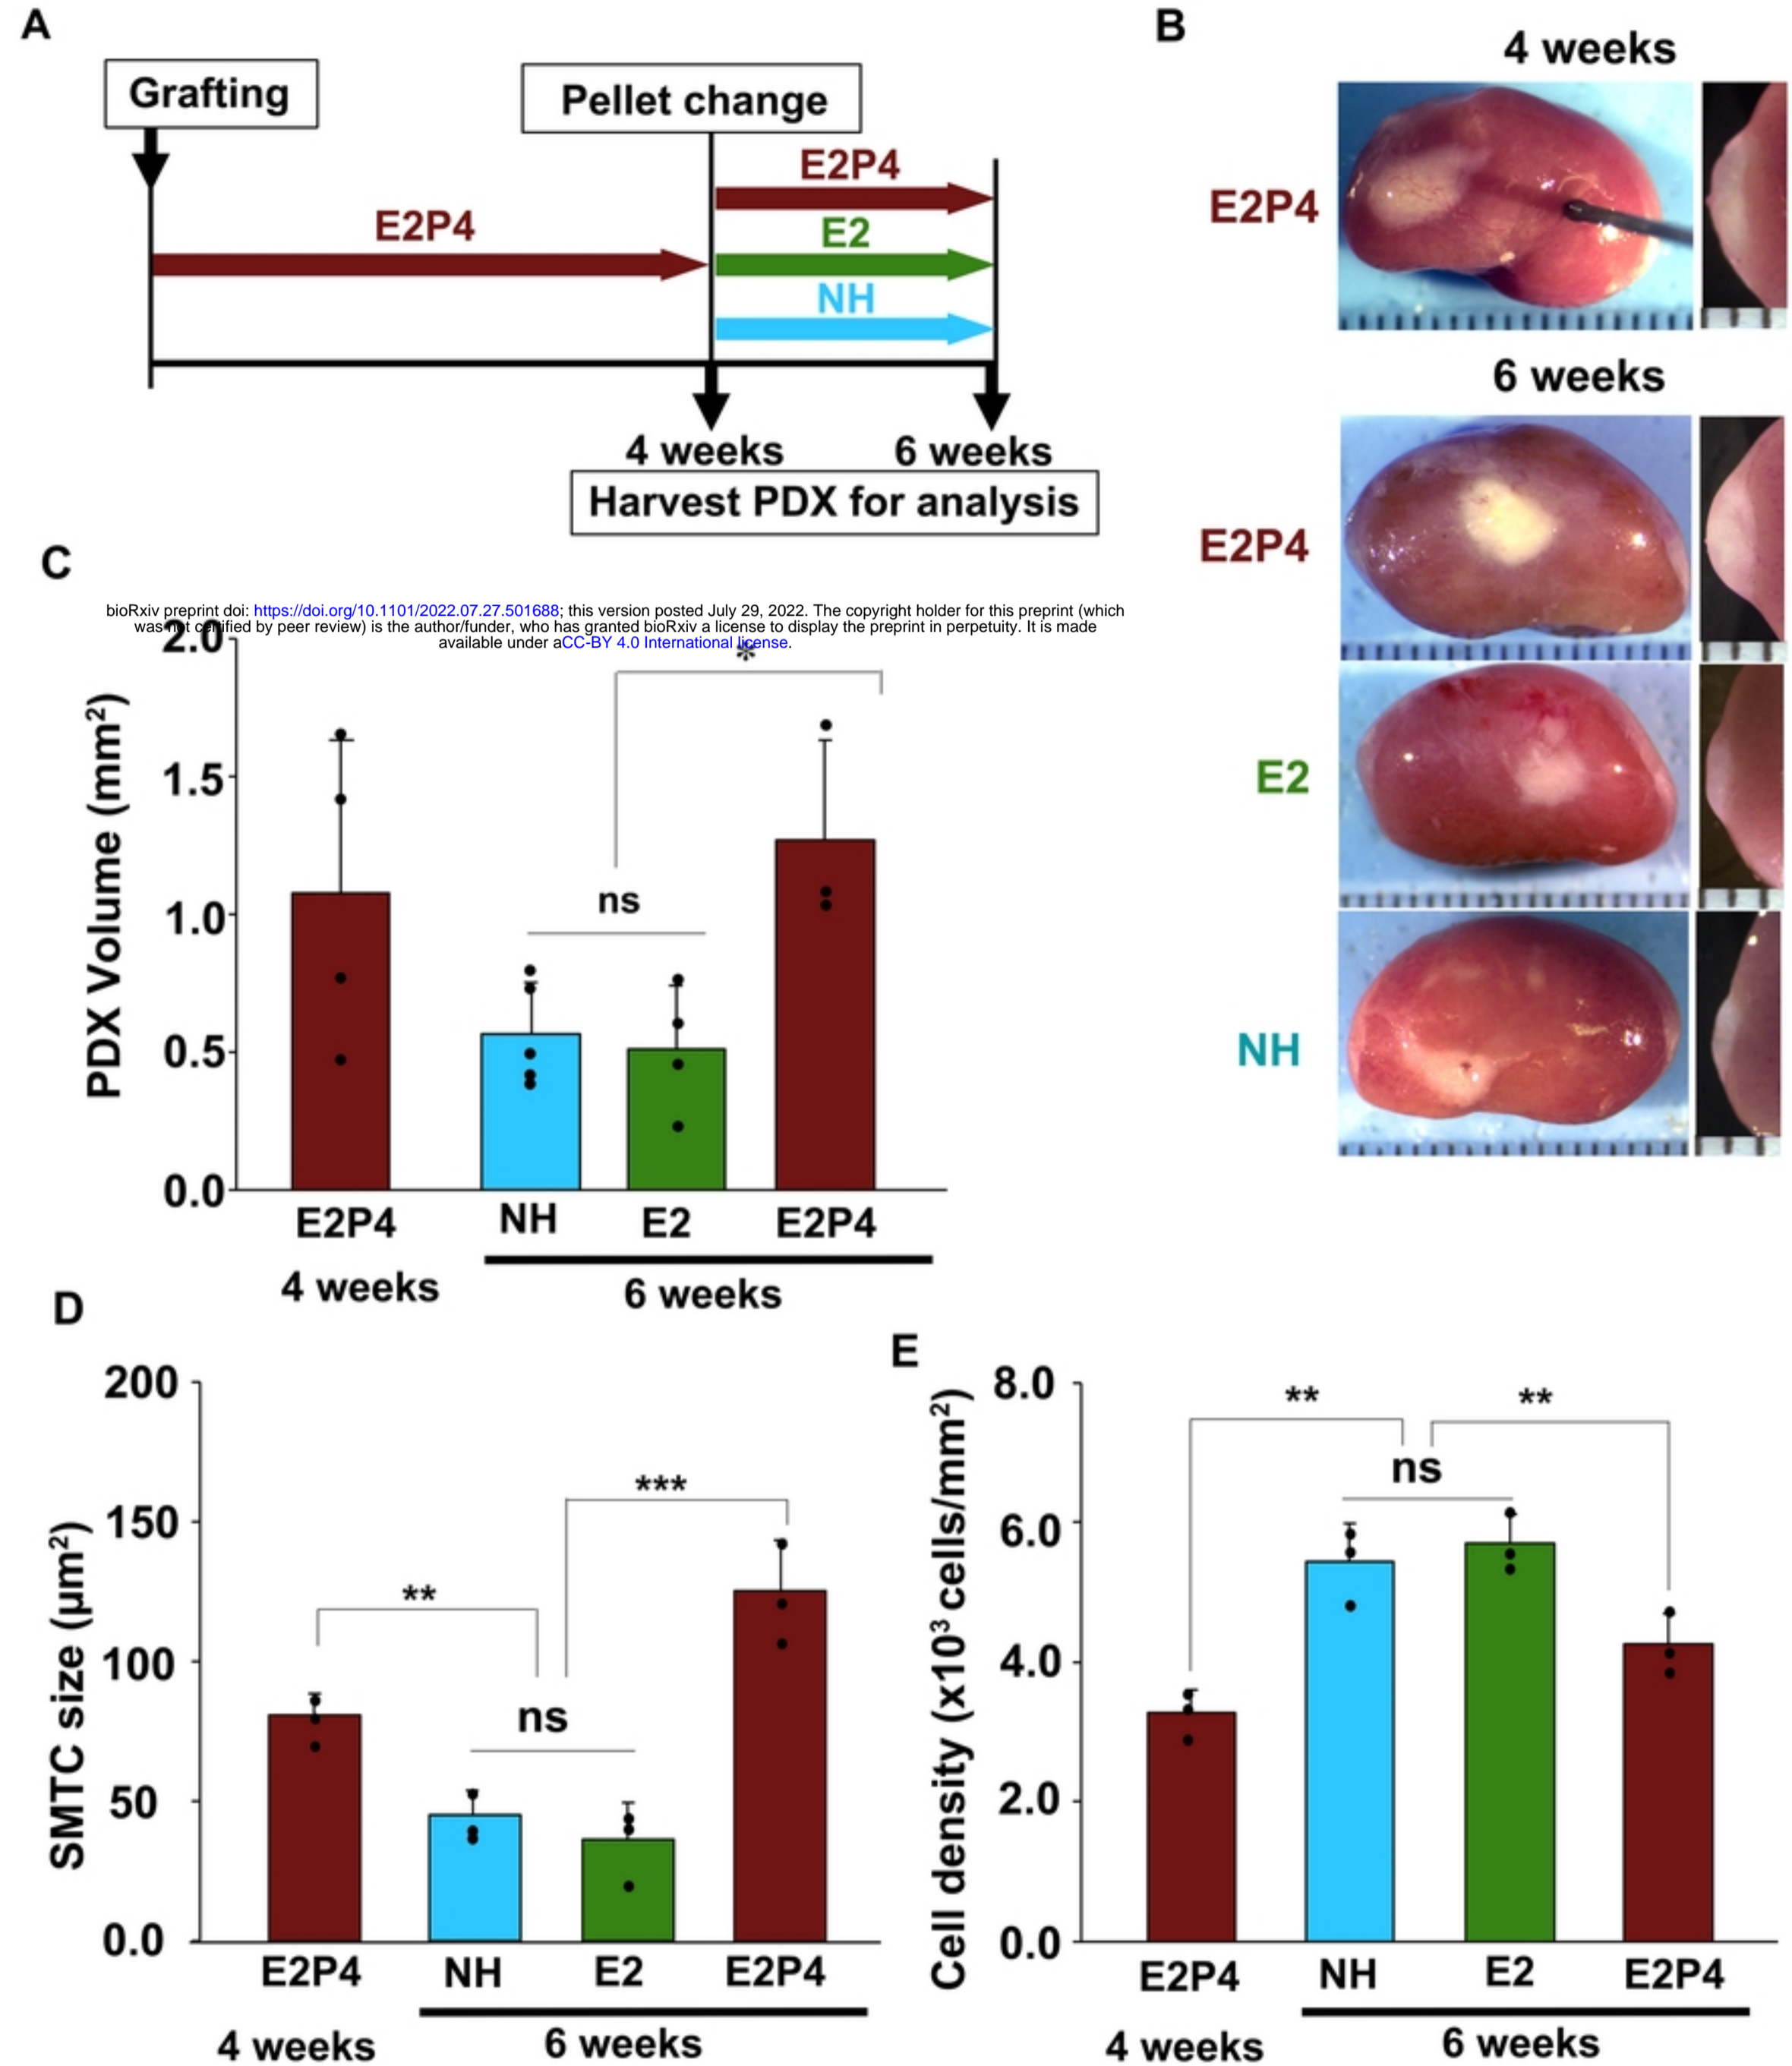

Figure 5

**A****myometrium****MED12-LM****HMGA2-LM****FH-LM**

bioRxiv preprint doi: <https://doi.org/10.1101/2022.07.27.501688>; this version posted July 29, 2022. The copyright holder for this preprint (which was not certified by peer review) is the author/funder, who has granted bioRxiv a license to display the preprint in perpetuity. It is made available under aCC-BY 4.0 International license.

**H&E**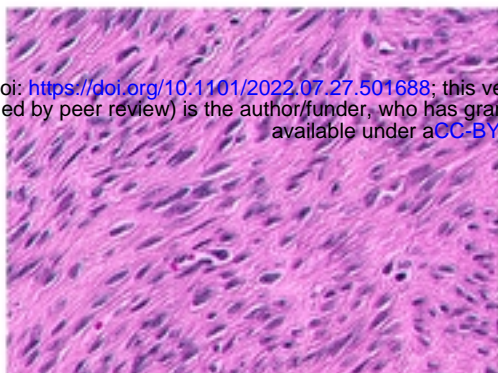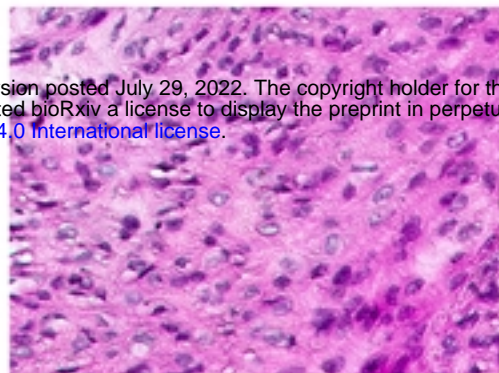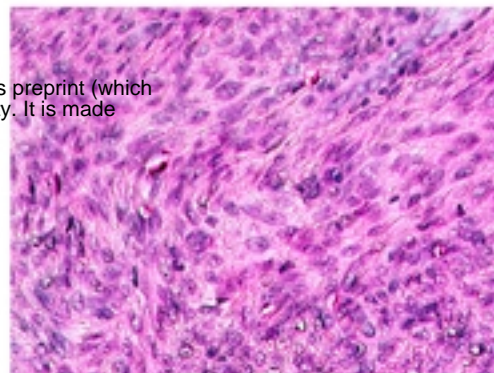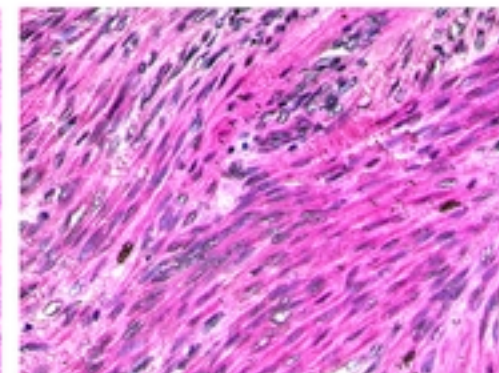**B****MED12**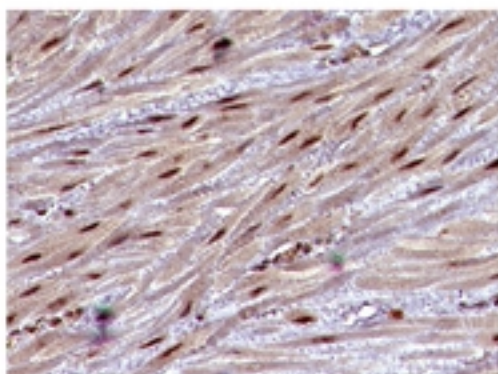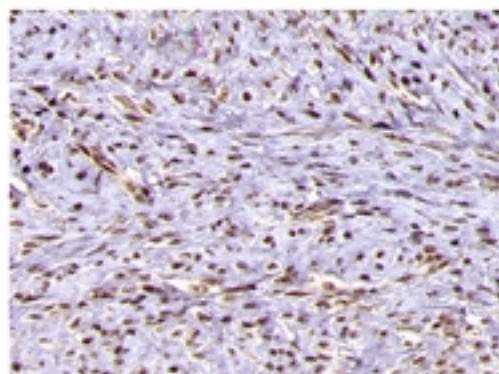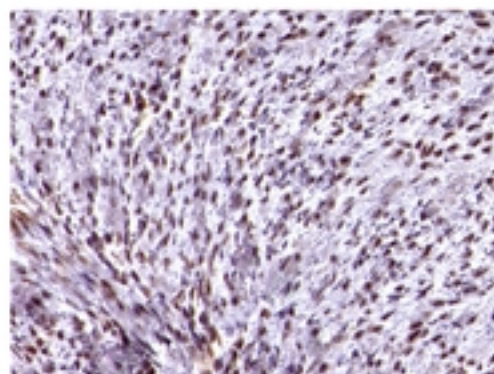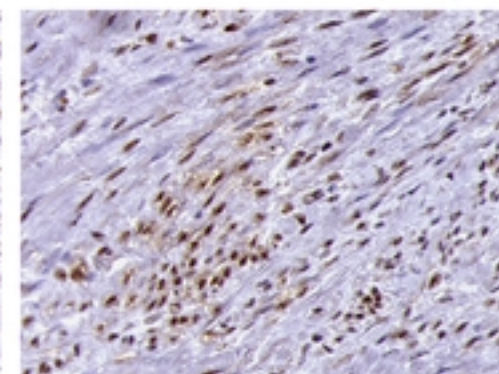**HMGA2**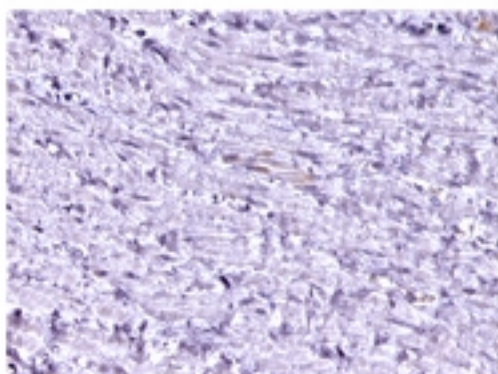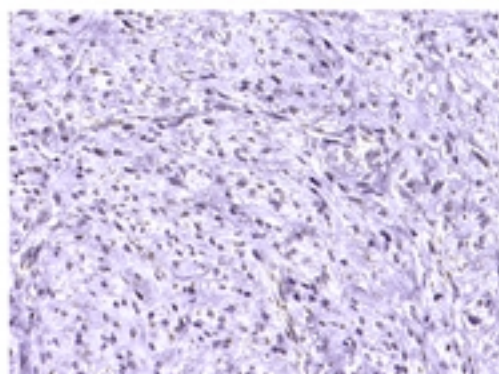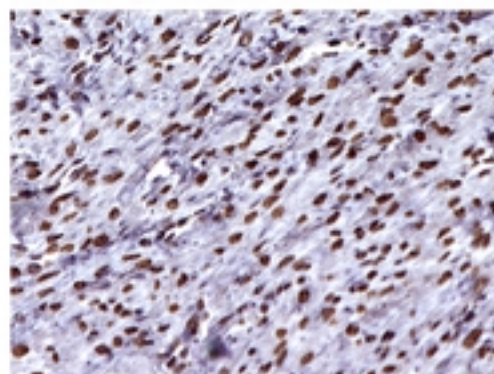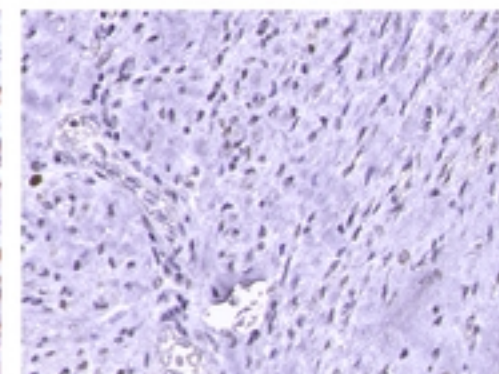**FH**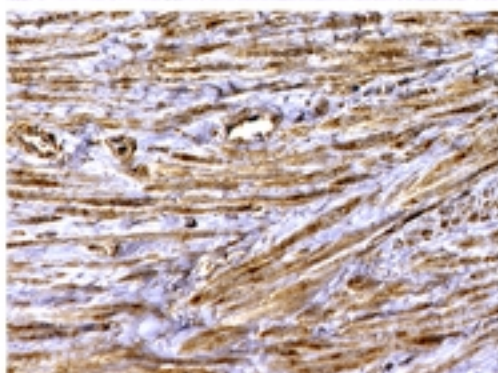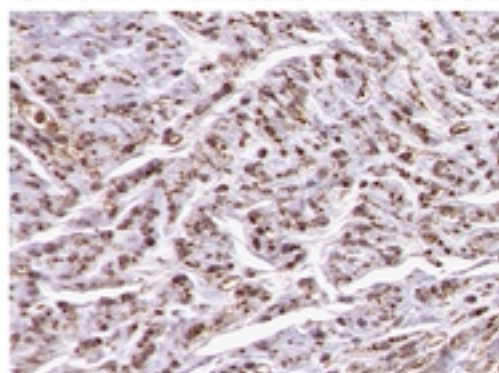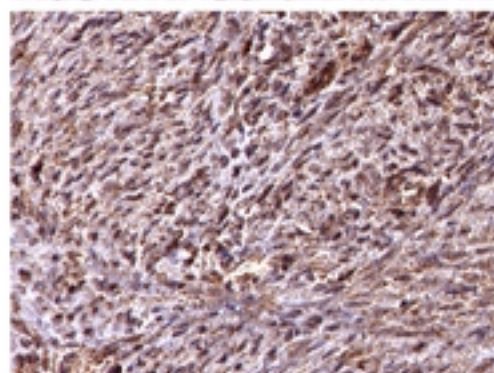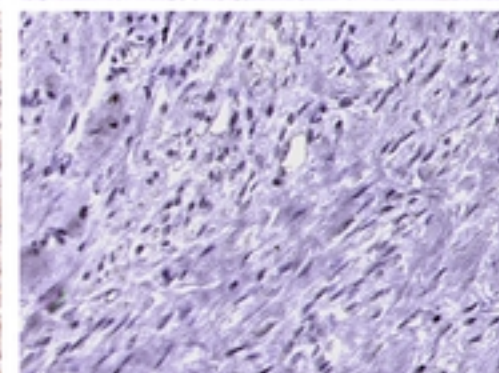**COL4A5**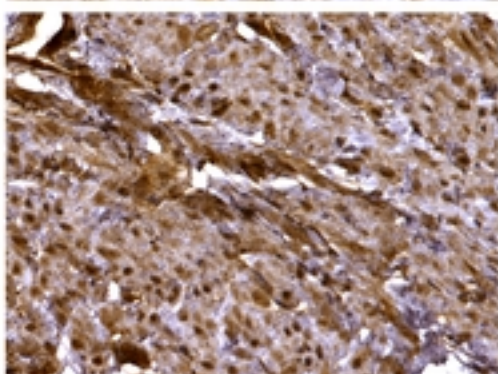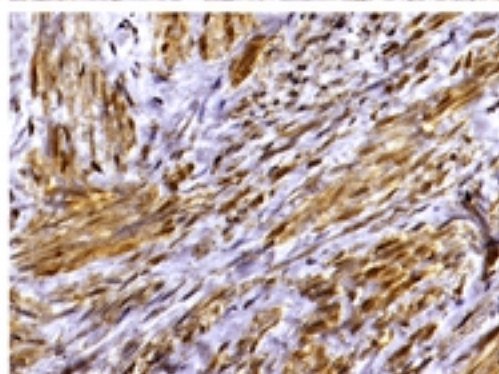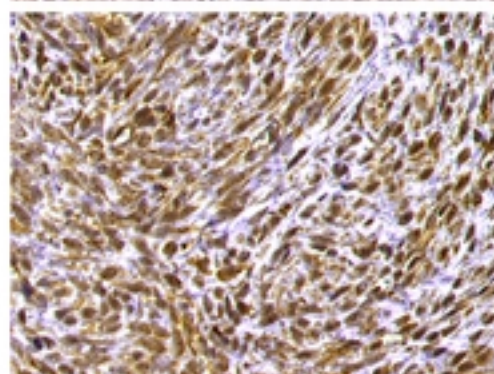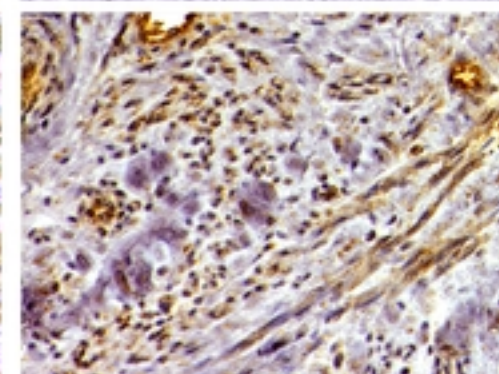**100µm****50µm****Figure1**

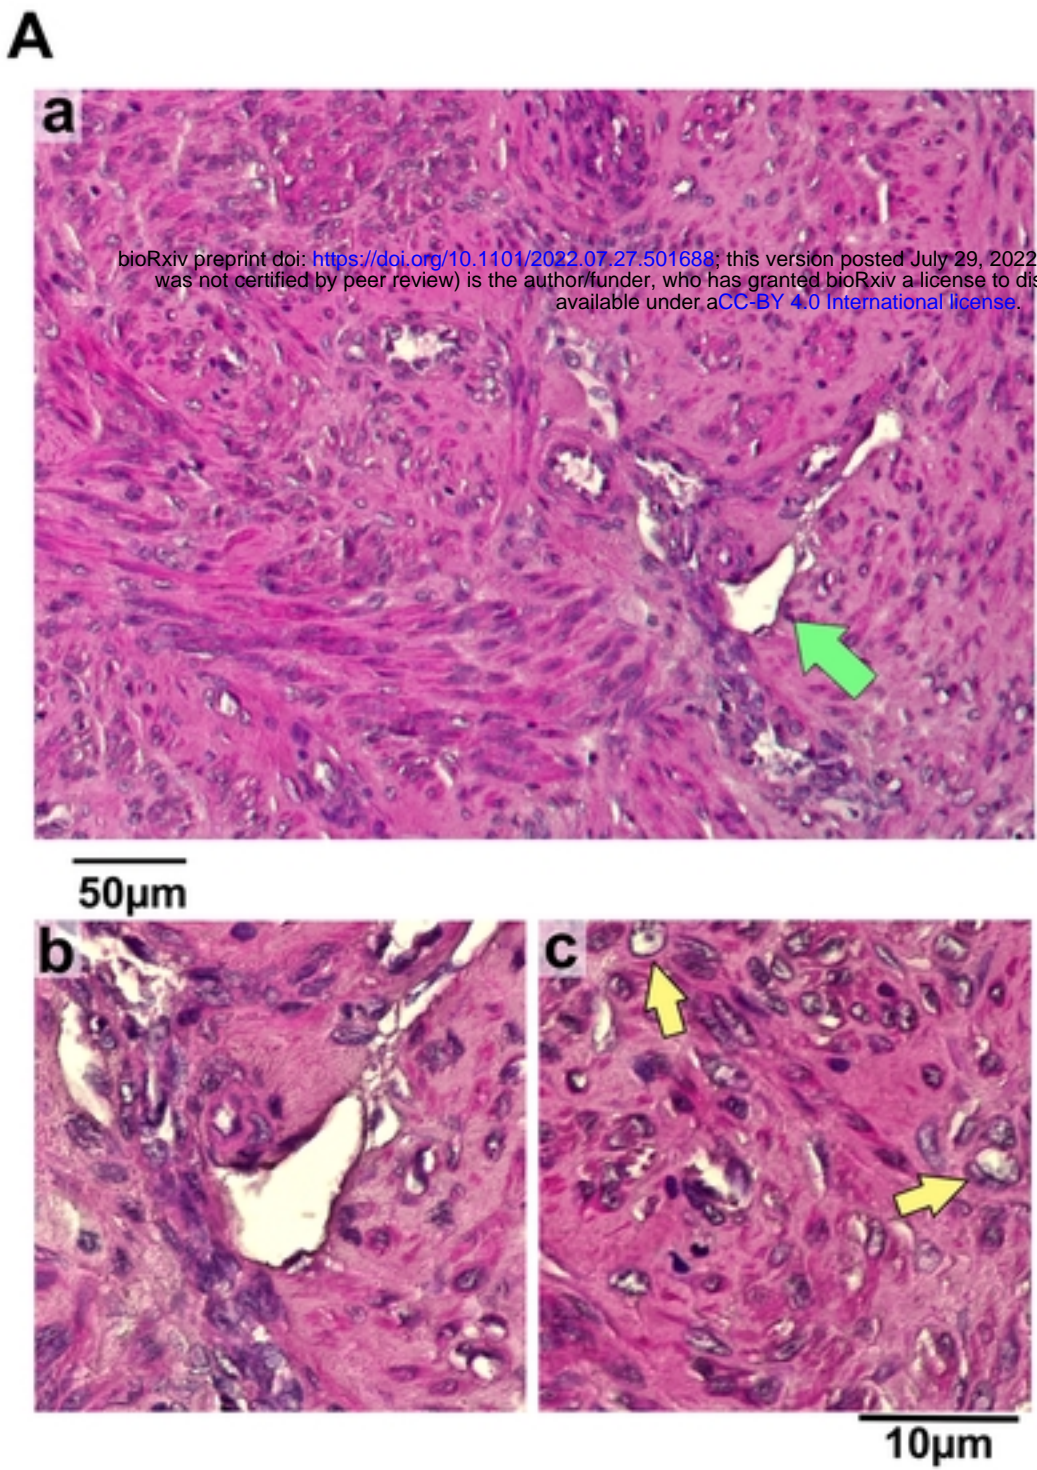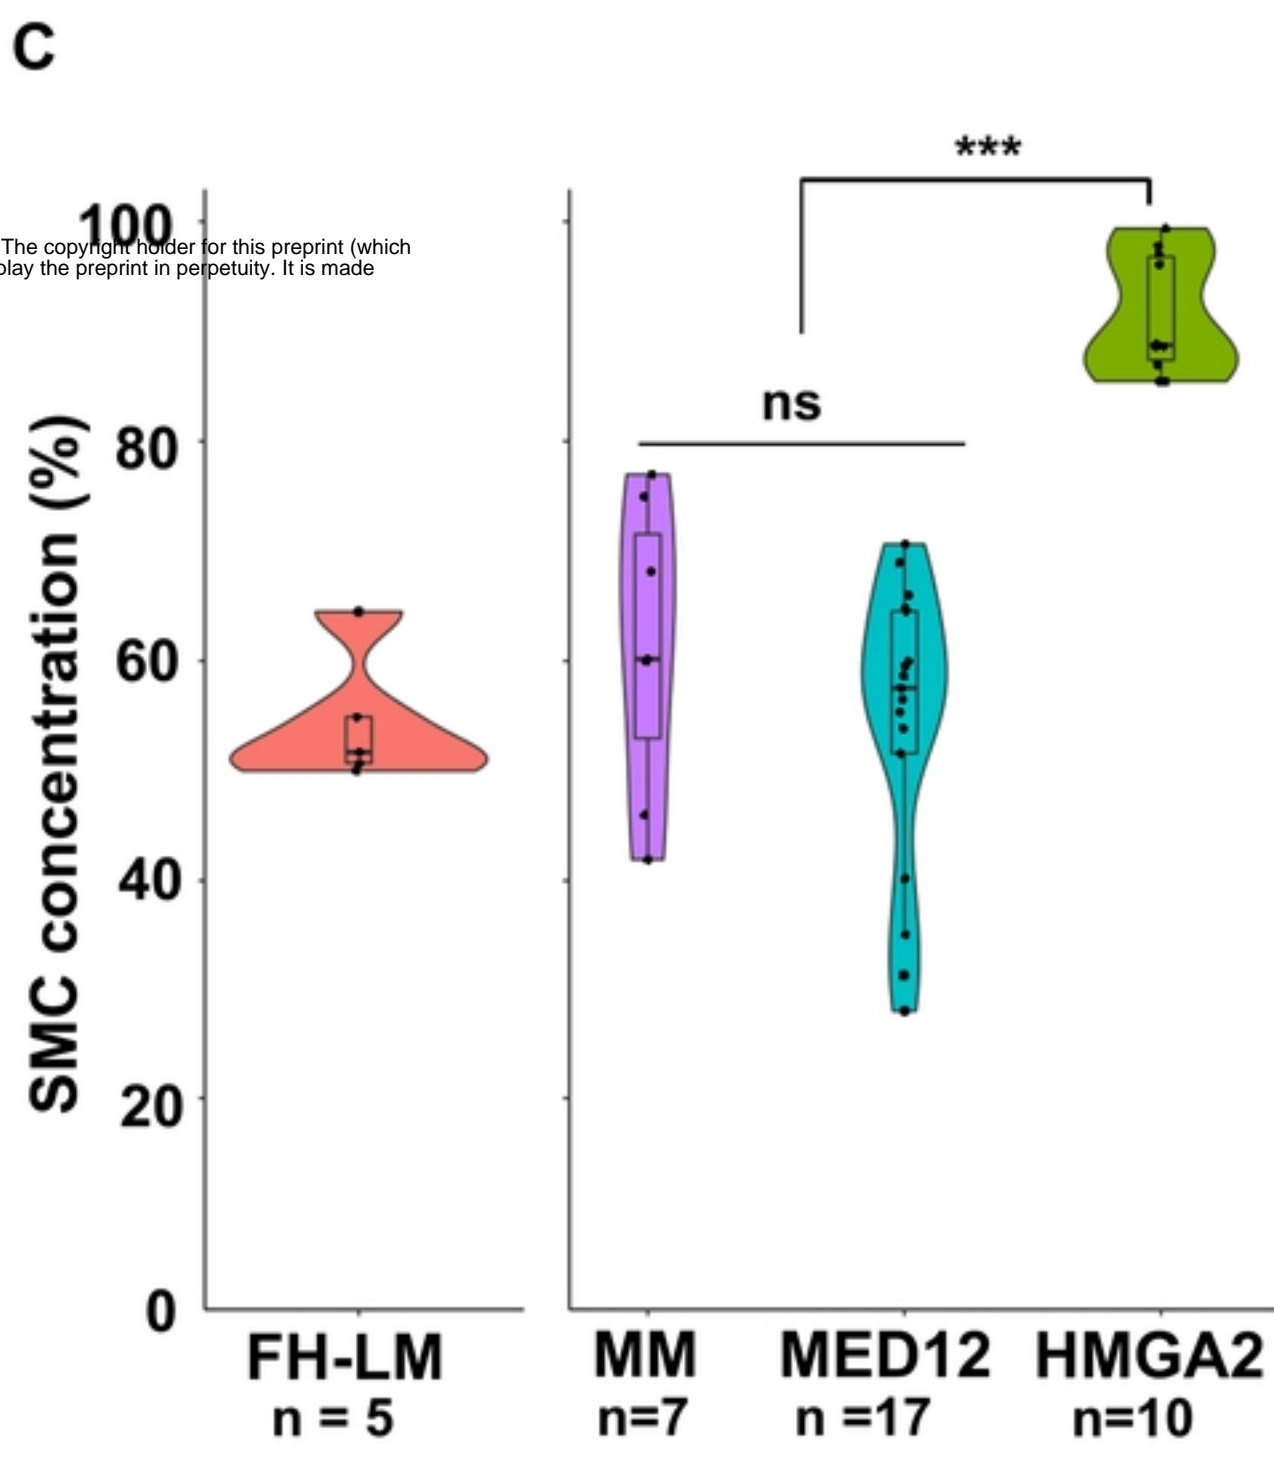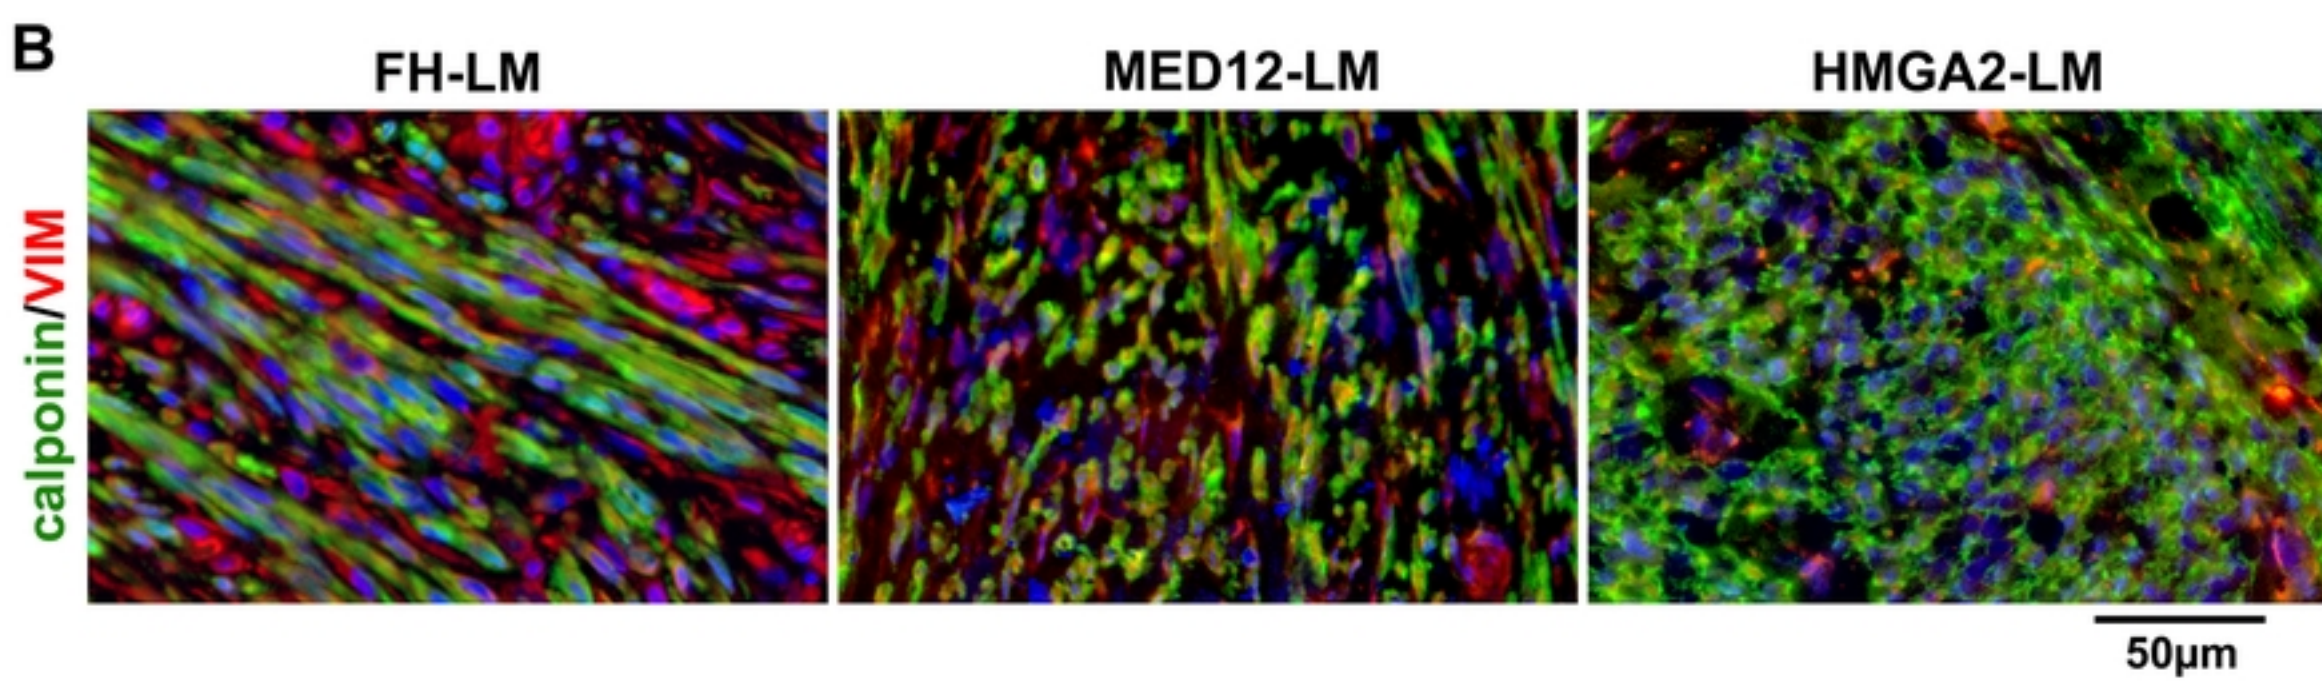

Figure2

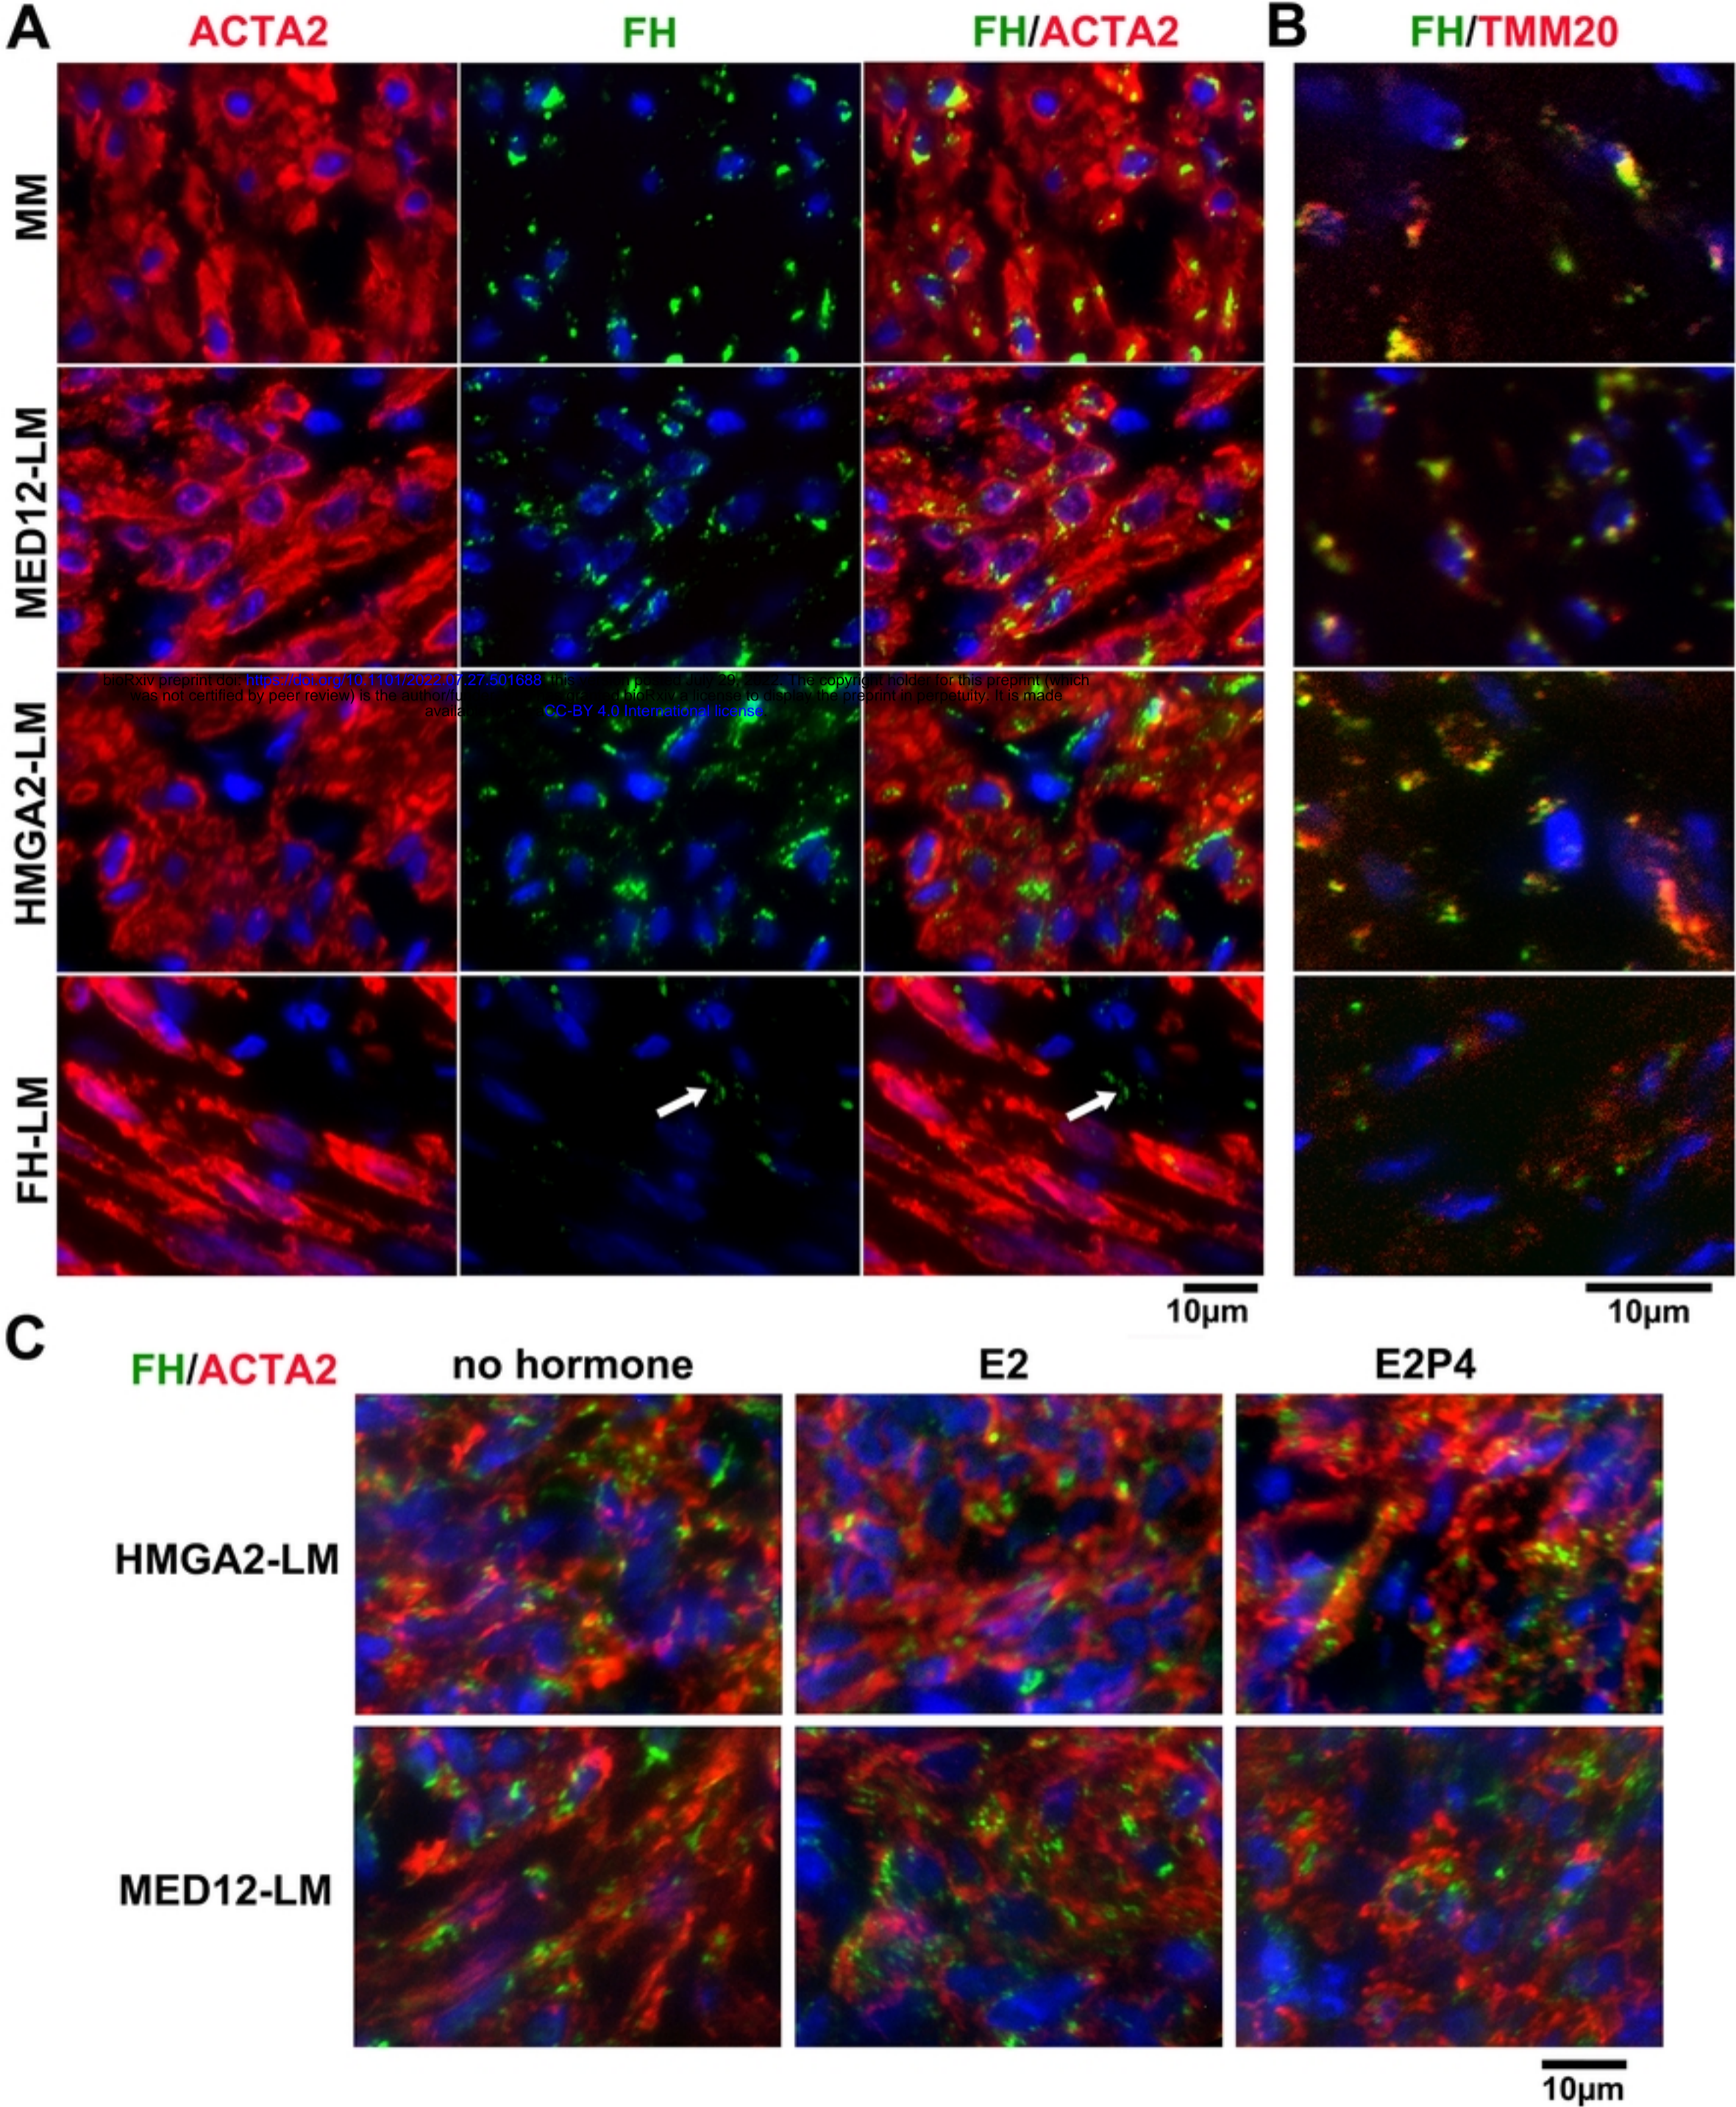

Figure3

**A**

**MM**

**MED12-LM**

**HMGA2-LM**

**FH-LM**

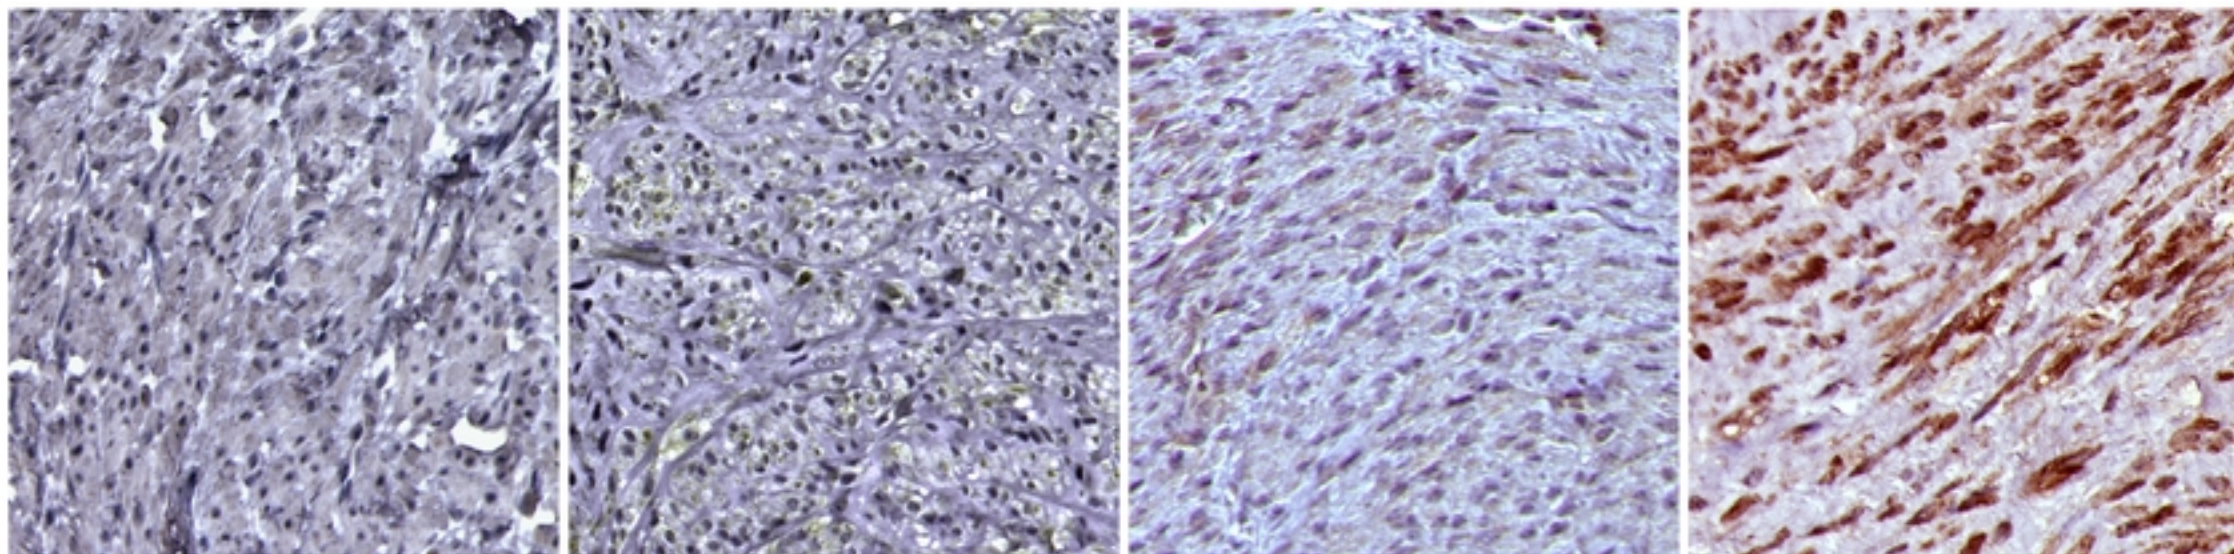

50µm

**B**

**AKR1B10/ACTA2**

**AKR1B10**

**ACTA2**

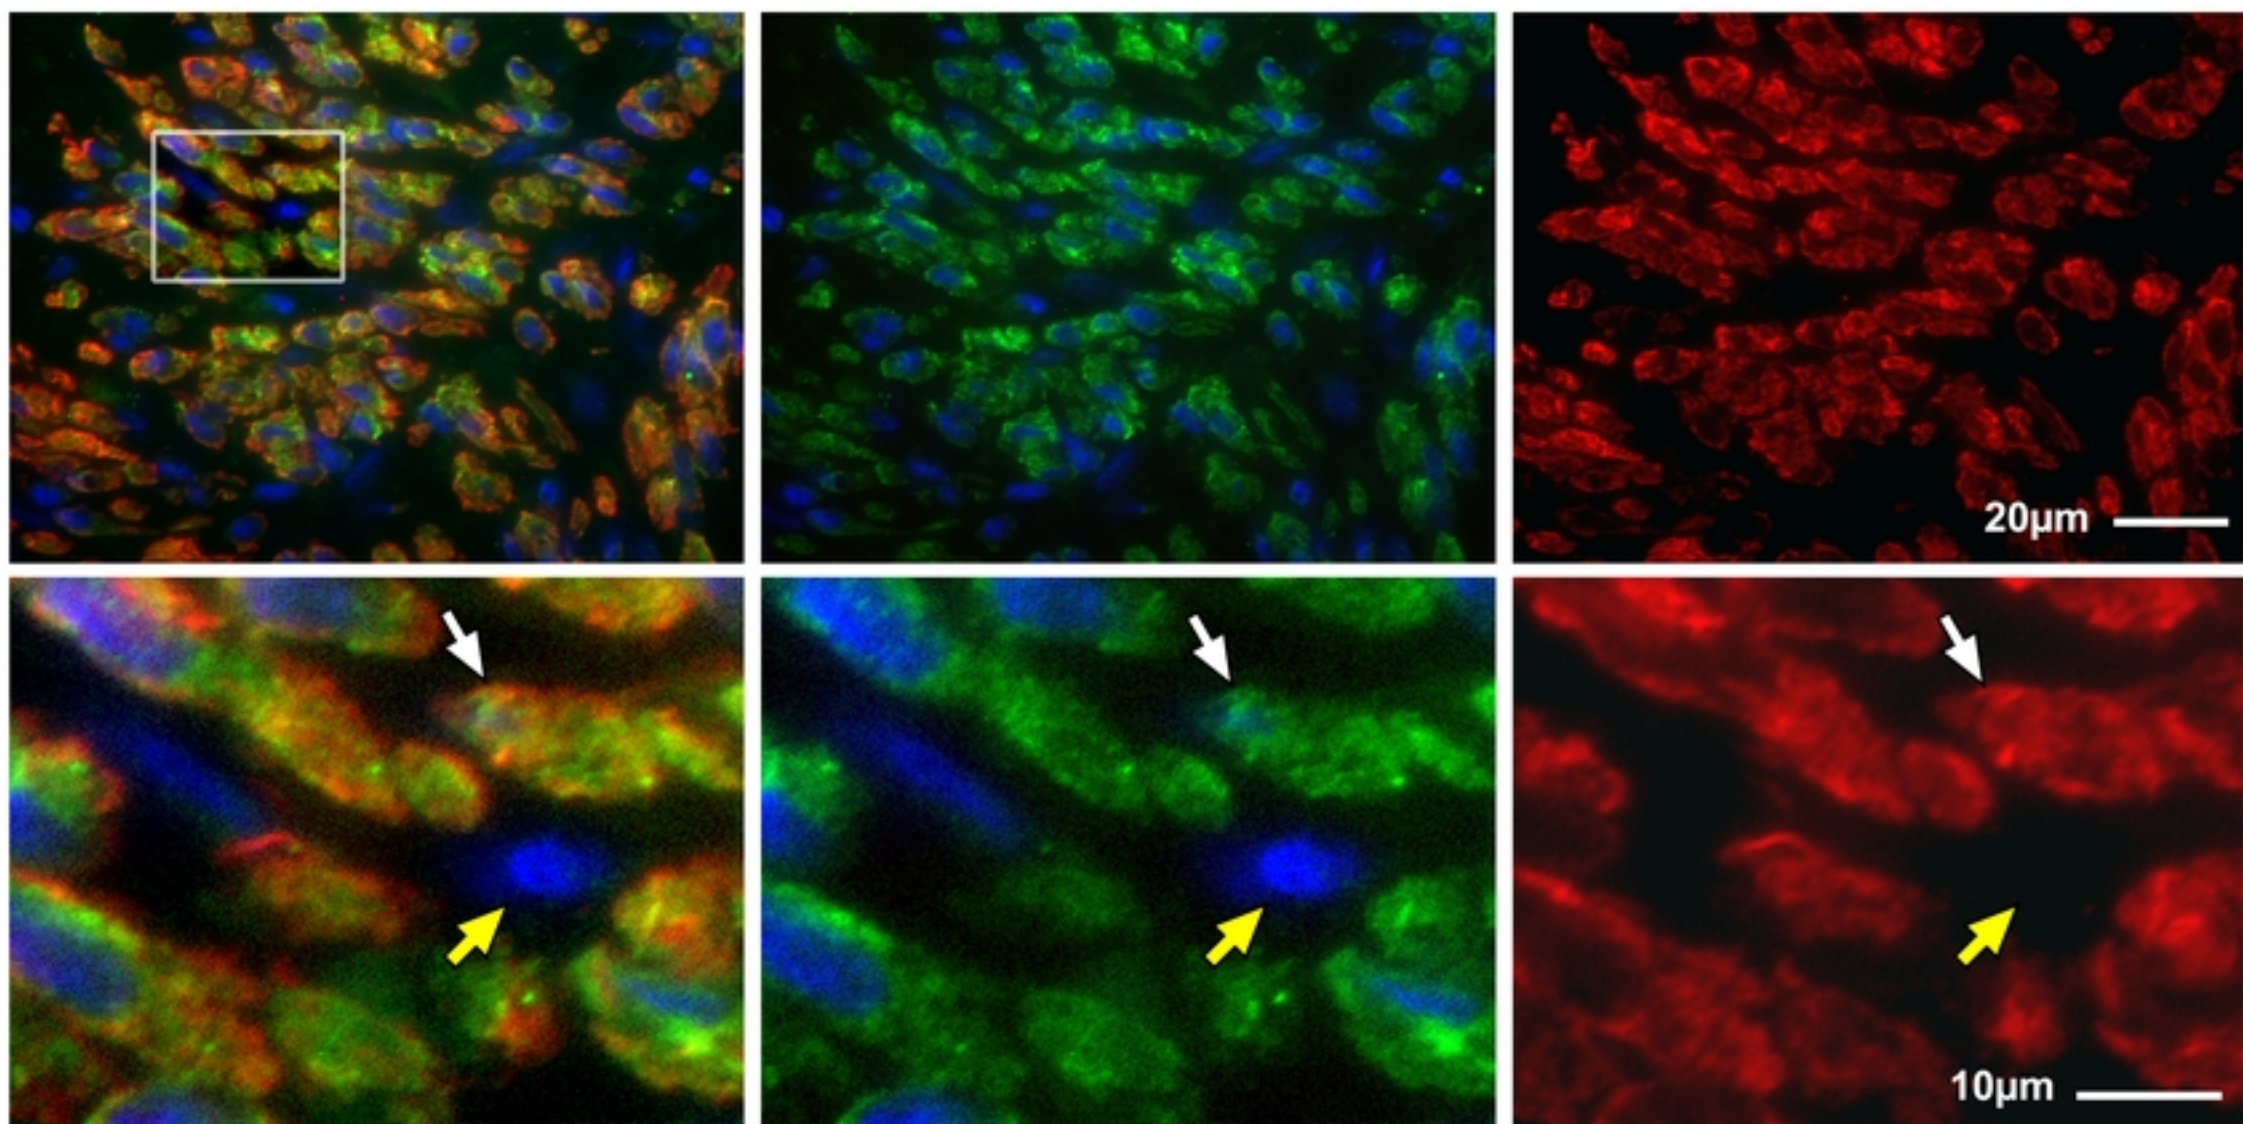

20µm

10µm

Figure4

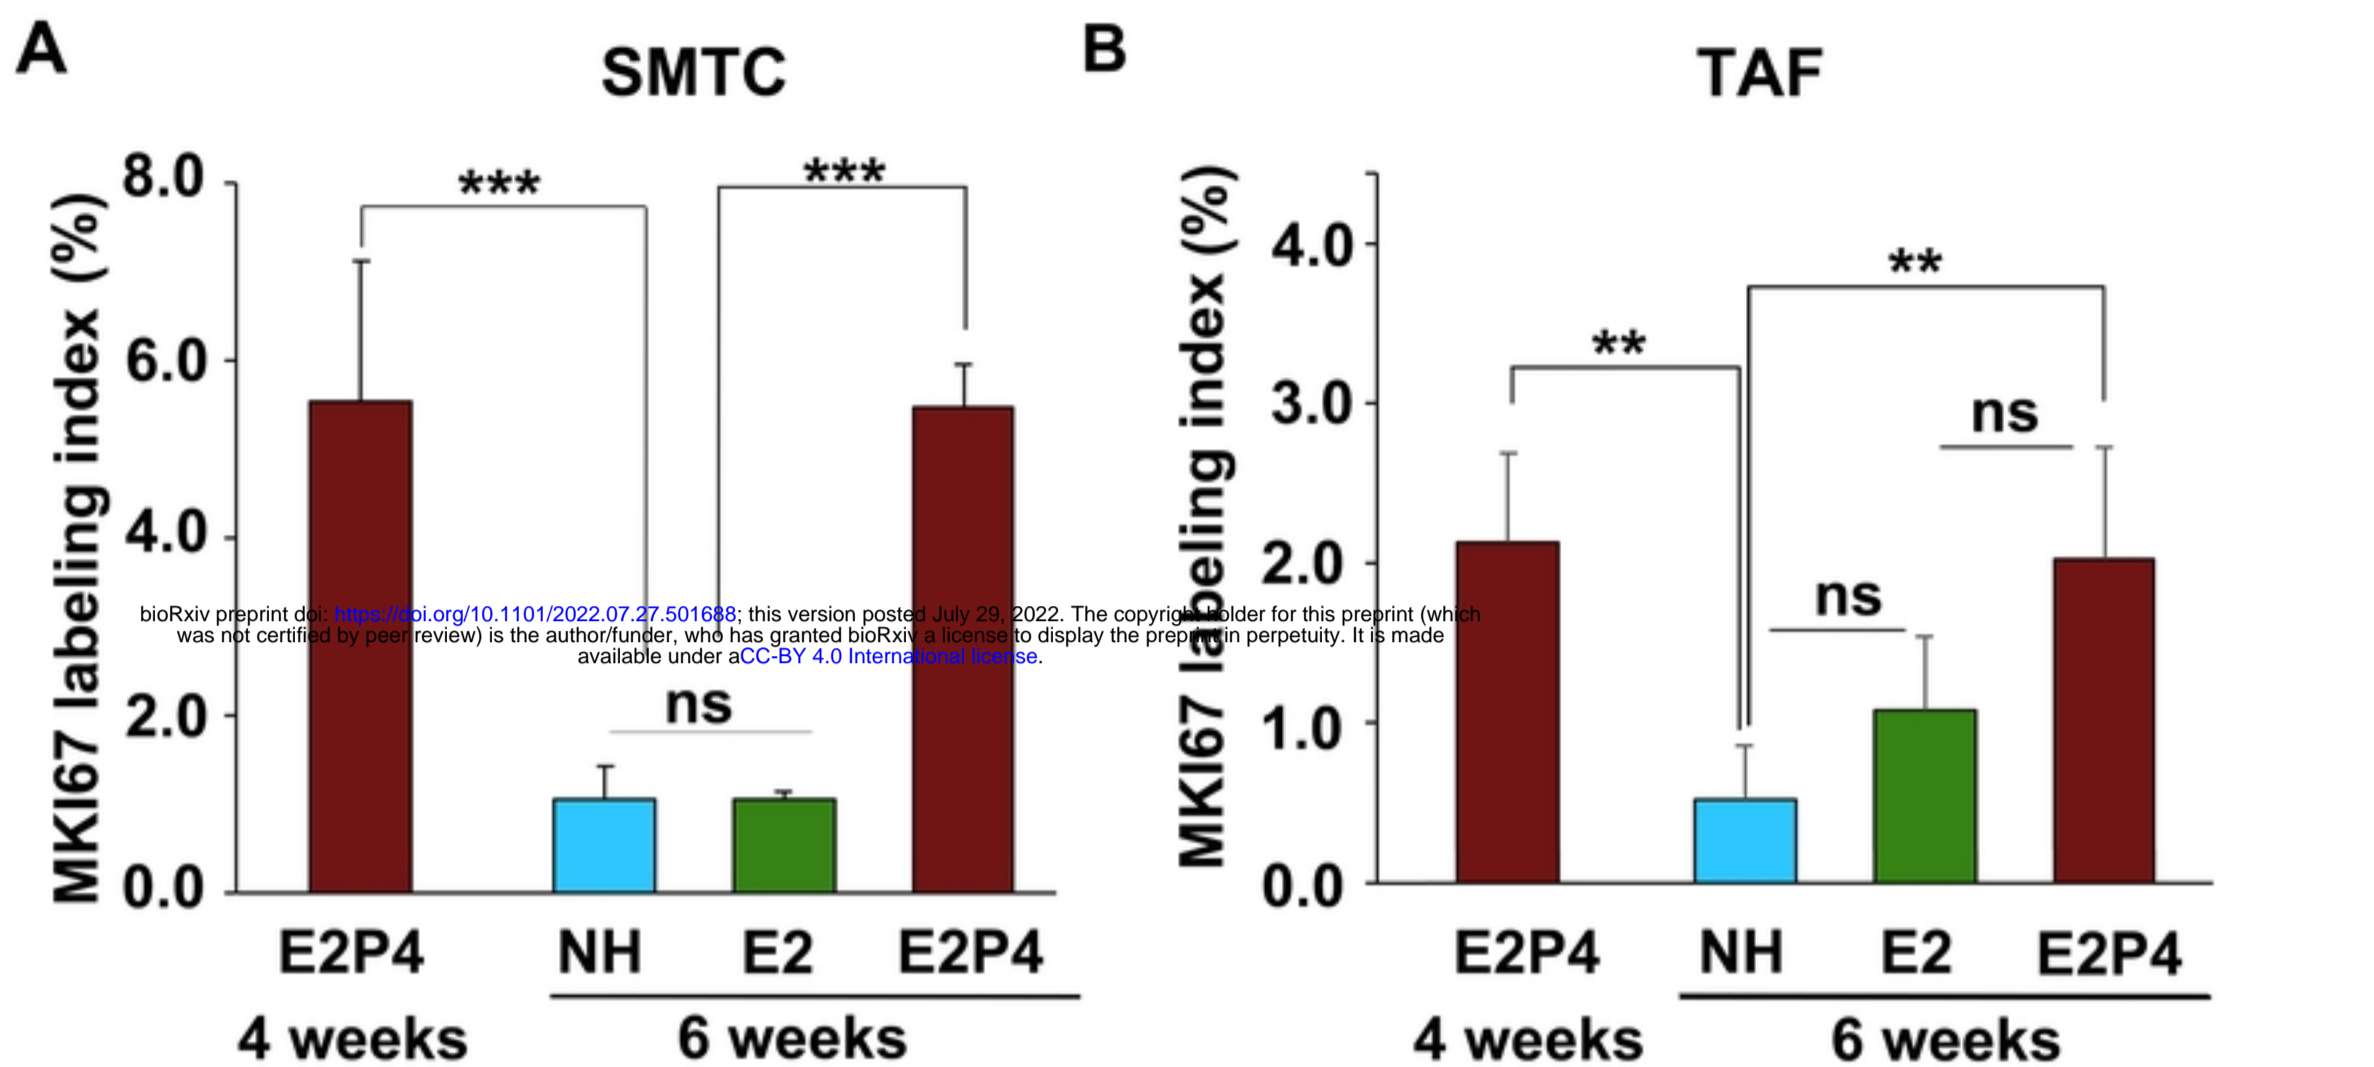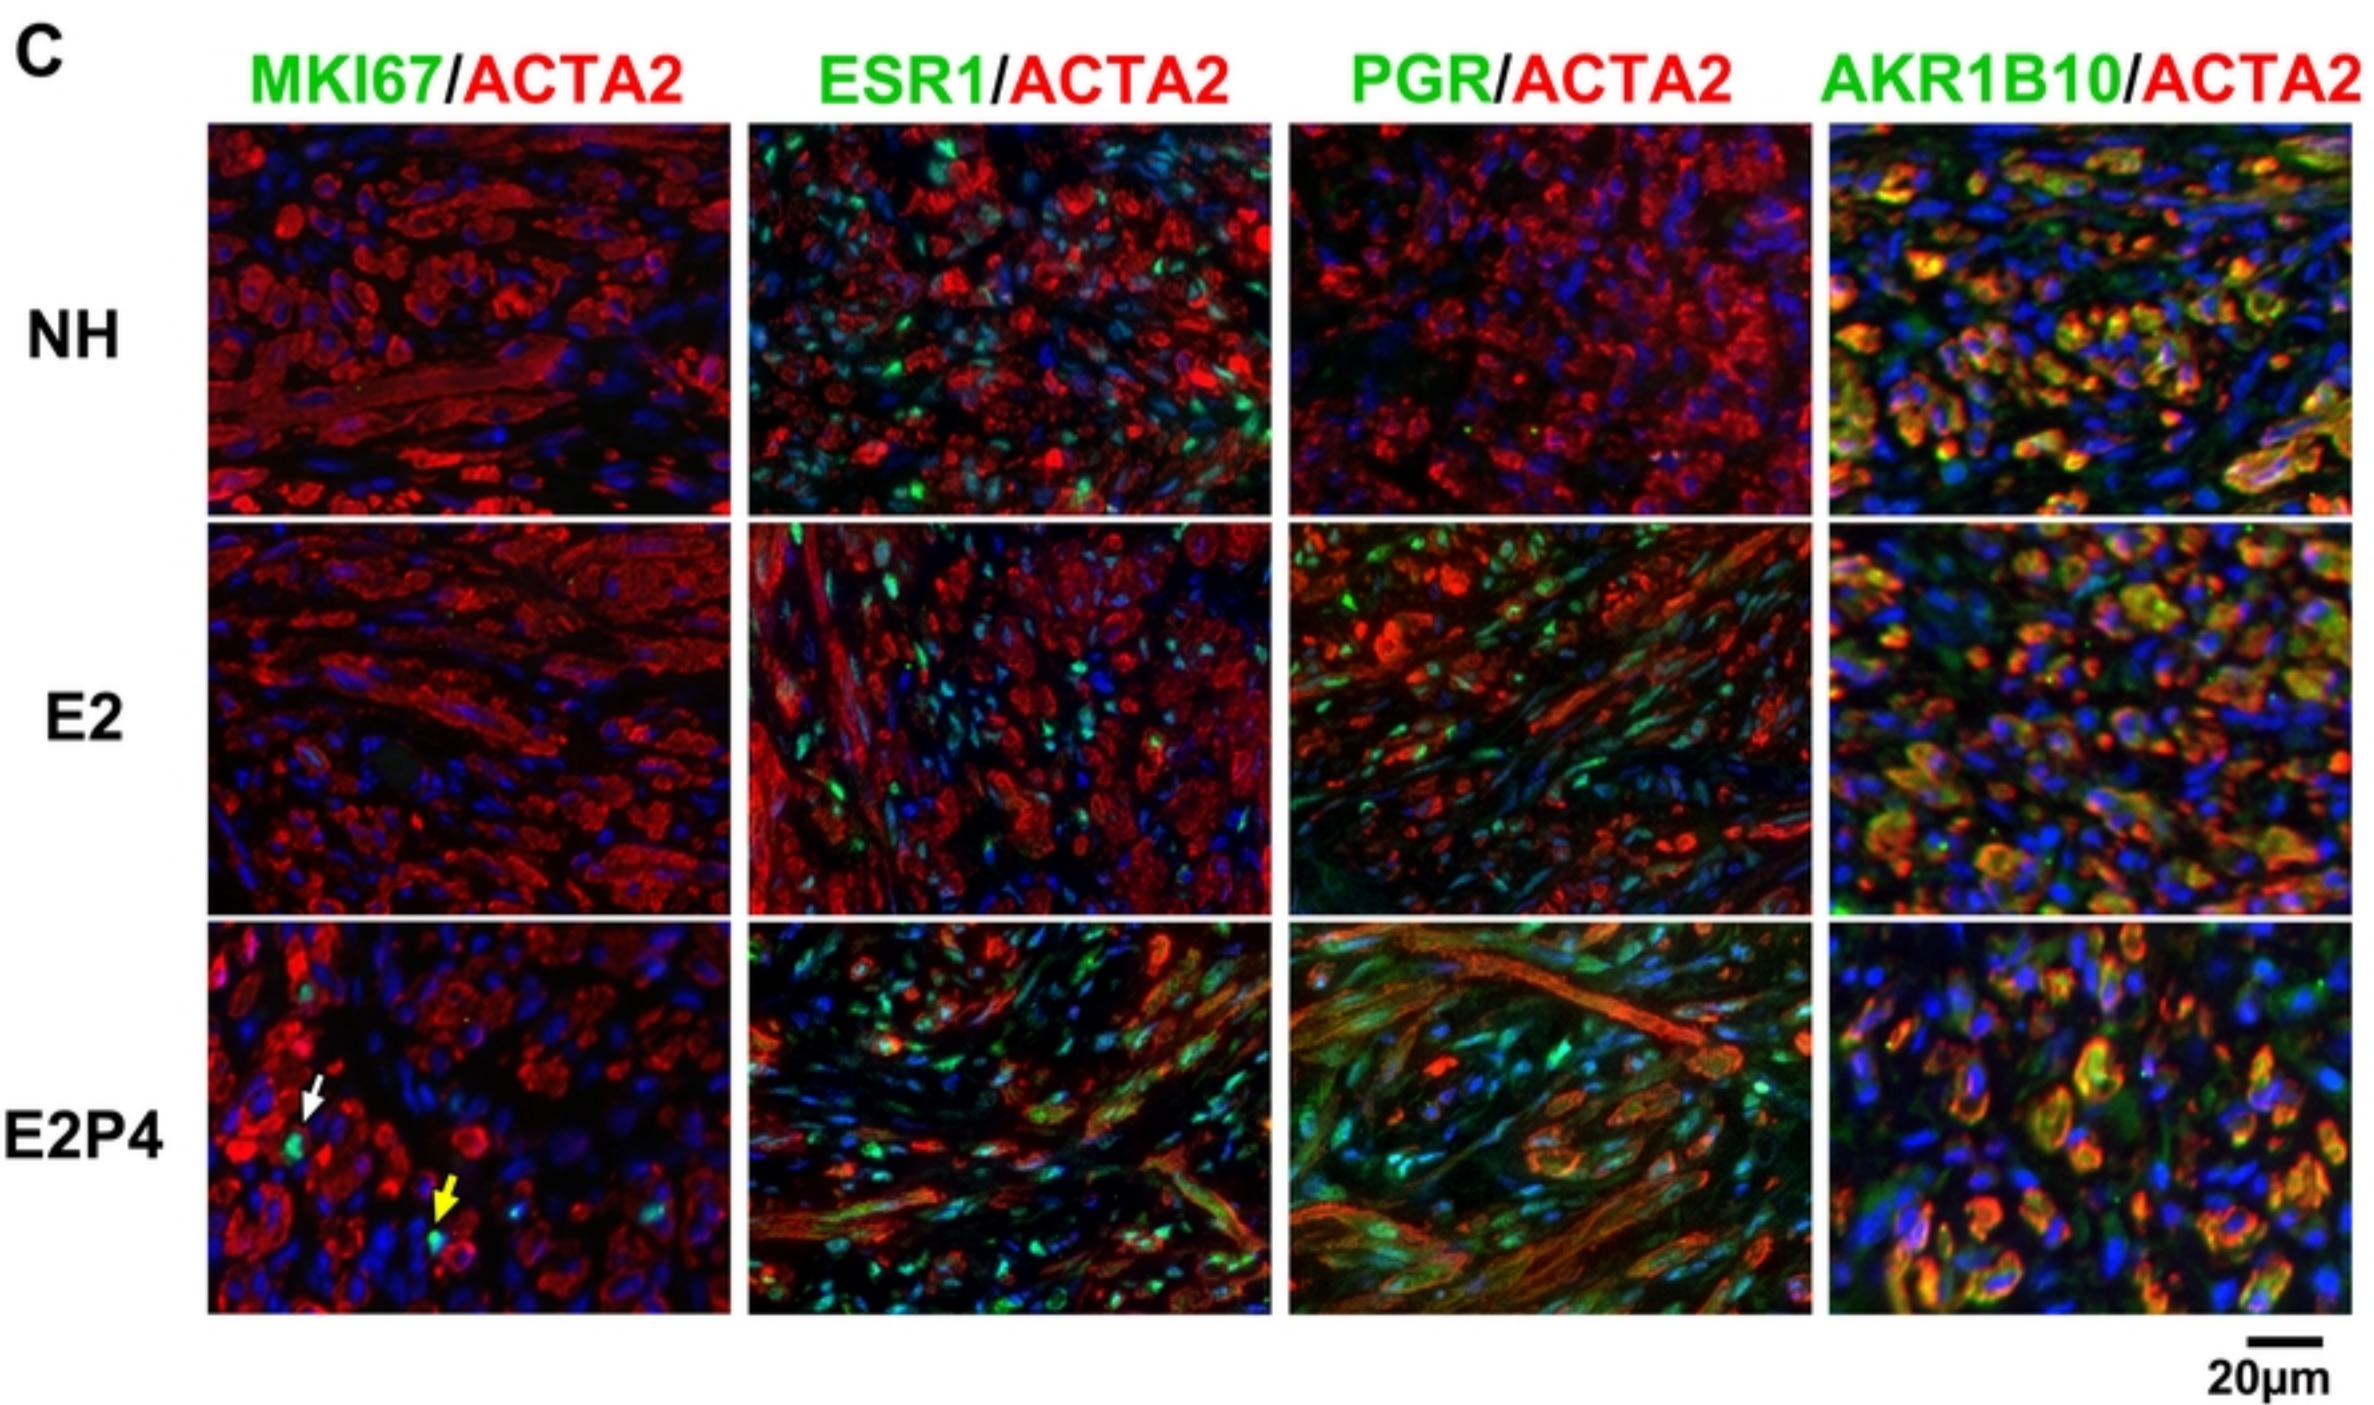

Figure6
